1 **Title:** Nutritional Immunity and Antibiotic Drug Treatments Influence Microbial Composition but  
2 Fail to Eliminate Urethral Catheter Biofilms in Recurrently Catheterized Patients

3 **Running Title:** Urethral Catheter Biofilm Dynamics in Spinal Cord-Injured Patients

4

5 **Authors:** Yanbao Yu<sup>a^</sup>, Harinder Singh<sup>a^</sup>, Tamara Tsitrin<sup>a</sup>, Keehwan Kwon<sup>a\*</sup>, Shiferaw Bekele<sup>a\*\*</sup>,  
6 Rodrigo V. Eiguez<sup>a</sup>, Yi-Han Lin<sup>a</sup>, Patricia Sikorski<sup>a\*\*\*</sup>, Kelvin J. Moncera<sup>b\*\*\*\*</sup>, Manolito G.  
7 Torralba<sup>b</sup>, Lisa Morrow<sup>c</sup>, Randall Wolcott<sup>c</sup>, Karen E. Nelson<sup>ab</sup> and Rembert Pieper<sup>a#</sup>

8

9 <sup>a</sup> J. Craig Venter Institute, 9605 Medical Center Drive, Rockville, Maryland 20850;

10 <sup>b</sup> J. Craig Venter Institute, 4120 Capricorn Lane, La Jolla, California 92037;

11 <sup>c</sup> Southwest Regional Wound Care Center, 2002 Oxford Avenue, Lubbock, Texas 79410;

12 \* GlaxoSmithKline, 1250 S. Collegeville Rd., Collegeville, PA 19426;

13 \*\* University of Maryland Medical Center, 655 W Baltimore Street, Baltimore, MD 21201;

14 \*\*\* Laboratory of Parasitic Diseases, NIAID, NIH, 4 Memorial Drive, Bethesda, MD 20892 and  
15 Department of Microbiology and Immunology, Georgetown University, 3900 Reservoir Road,  
16 N.W., Washington, DC 20057;

17 \*\*\*\* Western University of Health Sciences, College of Osteopathic Medicine of the Pacific, 309 E  
18 2nd St, Pomona, CA 91766;

19 <sup>^</sup> Authors contributed equally

20 <sup>#</sup>Corresponding author: Rembert Pieper, Email: [rembertpieper2@gmail.com](mailto:rembertpieper2@gmail.com); Tel: (301) 795-7605

21 **Abstract**

22 Polymicrobial biofilms that form on indwelling urethral catheters used by neurogenic  
23 bladder patients are known to recur following catheter replacements. Uropathogens dominate in  
24 catheter biofilms (CBs), grow and disperse as multi-cellular aggregates. Their microbial  
25 complexity, the characteristics of host immune responses and the molecular crosstalk in this  
26 ecosystem are incompletely understood. By surveying eight patients over up to six months with  
27 meta-omics analysis methods, we shed new light on the longitudinal microbial dynamics in CBs  
28 and the microbial-host crosstalk. There was evidence of chronic innate immune responses in all  
29 patients. Pathogens dominated the microbial contents. *Proteus mirabilis* often out-competed other  
30 species in cases of salt encrustation of catheters. The examination of proteomes in CBs and  
31 associated urinary pellets revealed many abundant bacterial systems for transition metal ion (TMI)  
32 acquisition. TMIs are sequestered by effector proteins released by activated neutrophils and  
33 urothelial cells, such as lactotransferrin and calgranulins, which were abundant in the host  
34 proteomes. We identified positive quantitative correlations among systems responsible for  
35 siderophore biosynthesis, TMI/siderophore uptake and TMI cellular import in bacterial species,  
36 suggesting competition for TMIs to support their metabolism and growth in CBs. *Enterococcus*  
37 *faecalis* was prevalent as a cohabitant of CBs and expressed three lipoproteins with apparent TMI  
38 acquisition functions. Fastidious anaerobic bacteria such as *Veillonella*, *Actinobaculum*, and  
39 *Bifidobacterium* grew in CB communities that appeared to be oxygen starved. Finally, antibiotic  
40 drug treatments were shown to influence microbial composition of CBs but failed to prevent re-  
41 colonization of urethral catheters with persisting and/or drug-resistant newly emerging pathogens.

42

43

44

45

## 46 Introduction

47 Urethral catheter-associated urinary tract infection (CAUTI) is the most common type of  
48 complicated UTI. CAUTIs have a higher risk of recurrence, pyelonephritis and bacteremia than  
49 uncomplicated UTIs in nosocomial environments (1-3). Asymptomatic cases are usually  
50 diagnosed as catheter-associated asymptomatic bacteriuria (CAASB). The use of nearly 100  
51 million urethral catheters per year worldwide, the 3% to 10% incidence of bacteriuria over 24  
52 hours following patient catheterization and an average bladder catheter insertion time of 72 h (2)  
53 suggest an estimated 9 to 27 million CAUTI cases per year globally. Among the most common  
54 causes are *Escherichia coli*, *Klebsiella pneumoniae*, *Pseudomonas aeruginosa*, *Proteus mirabilis*,  
55 *Enterococcus* and *Candida spp.* (1, 3, 4). Indwelling Foley catheters are often used by patients  
56 with anatomical urinary tract abnormalities and neurogenic bladder syndrome and retained in the  
57 urinary tract for one week or longer. Microbial colonization is difficult to avoid even when catheters  
58 are regularly replaced, and antibiotic drug treatments are administered. Bacteria adapted to form  
59 biofilms (e.g., *Enterococcus faecalis*, *P. aeruginosa*, and *E. coli*) and those that degrade urea and  
60 use ammonia as a nitrogen source (e.g., *Proteus* and *Providencia spp.*) dominate microbial  
61 communities that form on catheter surfaces (3, 5, 6). Urea degradation alkalizes the pH of urine  
62 and triggers the precipitation of phosphate salt crystals in this milieu, thus increasing the risk of  
63 luminal occlusion and complications such as urinary stones and kidney infections (3). Unless  
64 specific risk factors exist (e.g., a compromised immune system or pregnancy), clinical guidelines  
65 do not recommend the use of antibiotics for CAASB (7). Of major concern are the genetically  
66 acquired and innate resistances of CAASB-associated bacteria against several classes of  
67 antibiotic drugs. Most of them belong to the ESKAPE group of pathogens (8). Understanding the  
68 mechanisms that drive microbial cohabitation and competition in urethral catheter biofilms (CBs)  
69 may lead to new approaches to prevent or disrupt their formation.

70 The pathogenesis of UTI and CAUTI has been studied extensively in the context of *E. coli*  
71 and *P. mirabilis* (4, 9-12). The innate immune system has a critical role in the recognition of and  
72 defense against invading pathogens. Their surface molecular patterns are recognized by urothelial  
73 cell effectors such as immunoglobulin A and lipopolysaccharide-binding protein. The presentation  
74 to Toll-like receptors (TLRs) triggers cytokine release and signaling events that result in leukocyte  
75 infiltration. Neutrophils are the main type of immune cells attacking and phagocytosing microbial  
76 intruders (13). Pathogen clearance results from the activities of neutrophil granular effector  
77 proteins and reactive oxygen species (ROS) as well as extracellular trapping (14, 15).  
78 Investigations of *E. coli* have implicated the neutrophil cyclooxygenase-2 in the pathogenesis of  
79 recurrent UTI (16). Recurrence is influenced by host susceptibility to and the urovirulence of  
80 strains that colonize the human intestinal tract (17).

81 Type I fimbriae, which are expressed by many Gram-negative bacteria, are thought to  
82 initiate mucosal colonization by binding to mannosylated uroplakins, glycoproteins that coat the  
83 surface of urothelial umbrella cells (18). *Proteus mirabilis* produces several types of fimbriae of  
84 which the best characterized ones are the MR/P, UCF and PMF fimbriae (11). This species is the  
85 major cause of encrusted CBs where struvite and apatite minerals are deposited on catheter  
86 surfaces, triggered by urinary pH increase (3, 9, 11). Encrustation refers to the deposition of these  
87 minerals on the catheter surface along with the bacteria that thrive in this milieu. Bacterial cells in  
88 such biofilms can disperse and recolonize unoccupied catheter surfaces via swarming and  
89 adherence, processes that mediate ascendance to the kidneys and enhanced risk of  
90 pyelonephritis and urosepsis (3). The mechanisms that control microbial CB dynamics over time  
91 are complex and implicate the availability of nutrients such as carbohydrates, nitrogen, and  
92 transition metal ions (TMI). Iron and zinc are sequestered by the innate immune system during  
93 infections (9, 19, 20). Non-encrusted biofilms have been linked to the deposition of host proteins  
94 such as fibrinogen on catheter surfaces to which bacteria adhere (3, 4). Some biofilms have a

95 mucoid consistency due to production of extracellular polysaccharides that encapsulate bacterial  
96 cells and impede their killing by phagocytic cells. They have also been linked to renal  
97 complications by blocking urine flow (3).

98 Culture-based methods have shown that CBs typically harbor more than a single microbial  
99 organism (5, 6, 21). Culture-independent metagenomic surveys have identified fastidious  
100 microbes including genera such as *Actinomyces*, *Stenotrophomonas*, *Corynebacterium*, and  
101 *Finnegoldia spp.* in CBs (22, 23). While these findings indicate higher microbial diversity and the  
102 ability of strictly anaerobic bacteria to colonize catheter surfaces, to what extent fastidious  
103 microbes compete with typical uropathogens and cause inflammation in the host is unclear. A few  
104 studies have analyzed microbial profiles in urine sediments or CBs pertaining to long-term  
105 catheterization of patients. One study reported high prevalence of *E. coli*, *P. mirabilis*, and  
106 *Providencia stuartii* strains in the context of persistent bacteriuria in patients catheterized over four  
107 or more weeks (24). In a study examining 4,500 urine samples from repeatedly catheterized spinal  
108 cord-injured patients, the incidences of UTI with one and two or more identified bacterial species  
109 were 45% and 15%, respectively (25). A third study revealed polymicrobial colonization by two to  
110 four common uropathogens in 20 patients (26). Notably, antibiotic treatments altered the  
111 composition of CBs and failed to clear pathogens from the patients' urinary tracts (26).

112 Bladder catheterization itself was reported to cause sterile inflammation in a murine model,  
113 with CD<sup>45+</sup> neutrophils as the main infiltrating immune cells. Using this model, *E. coli* and *E.*  
114 *faecalis* infections were shown to cause urothelial barrier disruption and further immune cell  
115 infiltration (27). Pyuria is known to occur in patients with indwelling catheters independent of the  
116 symptomology (7). Our recent work revealed neutrophil and complement system activation at  
117 similar levels in patients diagnosed with CAASB and CAUTI after catheterization at a single  
118 timepoint (28). Here, we publish the first comprehensive analyses of catheter biofilms associated  
119 with recurrent catheterization of patients. We used 16S rRNA taxonomic and proteomic analyses,

120 and further validated results of the host-microbial crosstalk with biochemical and microbial culture  
121 methods.

122

## 123 **Results**

### 124 *Patient cohort, antibiotic treatments and phenotypic observations.*

125 We enrolled two female and seven male human subjects of either hispanic or caucasian  
126 ethnicities. All of them had spinal cord injuries and suffered from neurogenic bladder syndrome.  
127 Comorbidities were chronically infected wounds. During the patient visits for wound treatment,  
128 indwelling bladder catheters were usually replaced. All patients received topical wound treatments  
129 with antibiotic drugs. Systemic antibiotic treatments over a limited time pertained to three patients  
130 while this study was conducted. The drug treatment regimens and other medical data are provided  
131 in [Table S1 \(Suppl. Data\)](#). Patient P6 was diagnosed with a renal infection a month after specimen  
132 collections ended, probably via ascension of catheter-associated pathogens to the kidneys. UTI  
133 symptoms were not reported by patients while the study was performed, which is consistent with  
134 diagnoses of CAASB. Catheters were replaced in 1- to 3-week intervals to reduce risk of CAUTI  
135 and renal complications. We analyzed urine sediments collected as centrifugal pellets from  
136 catheter collection bags and biofilms extracted from external and internal catheter surfaces. The  
137 terms used for these specimens are UP and CB, respectively, and are from here on. They were  
138 collected longitudinally from patients over 2 to 6 months, ranging from 4 to 15 timepoints. Some  
139 timepoints were represented by only a CB, a UP or both types of samples. Catheter encrustation  
140 was observed for several samples from P4, P5, P6, and P7 ([Table S1, Suppl. Data](#)). The variation  
141 in CB biomasses among the patients is displayed in [Fig. 1](#). P6, the patient suffering a renal  
142 infection, revealed the highest average CB biomass. Four patients (P2, P4, P7, and P8) revealed  
143 only moderate variances in biomasses.

144

145 *Metagenomic data suggest polymicrobial colonization of catheters recurring in individual patients.*  
146 Compared to microbial cultures, 16S rRNA sequencing is a less biased method to determine the  
147 taxonomic composition of a microbial community. UP and CB samples derived from 8 patients  
148 were subjected to 16S rRNA gene analysis. The data suggested the presence of 1 to 15 distinct  
149 bacterial genera in 112 specimens ([Dataset S2, Suppl. Data](#)). Species-level resolution is not  
150 achieved by sequencing the V1-V3 region of 16S rRNA. Forty genera with operational taxonomic  
151 unit (OTU) abundances greater than 0.07% (arithmetic mean) were identified. Resolution at the  
152 genus level only allows inferences of the presence of bacteria causing UTI and the urogenital  
153 microbiome. Most prevalent were Enterobacteriaceae family members and *Enterococcus*. Less  
154 prevalent were *Staphylococcus* and *Aerococcus*. Among fastidious organisms, we identified  
155 genera belonging to Actinobacteria, Bacteroides and Fusobacteria. The same genera were often  
156 repeatedly identified in samples from a distinct patient, suggesting the biological recurrence of the  
157 bacteria in sequentially replaced catheters. There was evidence of abrupt changes in the  
158 taxonomic composition for some cases that we elaborate on in a later section. Among the genera  
159 rarely associated with pathogenesis in the urinary tract were *Bordetella*, *Globicatella* and  
160 *Haemophilus*. As shown in [Fig. 2](#), the bacterial genus diversity was moderately lower in salt-  
161 encrusted biofilms (P4, P6, and P7) compared to non-encrusted biofilms (P1, P2, and P8). P5  
162 datasets were split into these groups as salt crystals were observed only for three early collection  
163 timepoints. This data supports the notion that phosphate salt deposition on catheter surfaces  
164 favors growth of the urease-producing *Proteus/Providencia* group of bacteria (29). Quantitative  
165 information for OTUs from 16S rRNA sequencing data is of limited value due to differences in the  
166 16S rRNA gene amplification efficiencies (30). 16S rDNA taxonomic assignments were also useful  
167 to customize databases for proteomic analysis.

168



169 Metaproteomic data reveal dominance of *P. mirabilis* strains in salt-encrusted CBs and the ability  
170 of fastidious bacteria to persist in longitudinally profiled CBs.

171 Metaproteomic database searches were performed with iterative adaptations to the composition of  
172 protein sequence databases (details in Methods section) guided by 16S rRNA results. This  
173 process allowed us to: 1. identify the correct microbial species from a given genus, most relevant  
174 in cases where more than a single species from a genus is known to colonize the human urinary  
175 tract (e.g., *Proteus*, *Klebsiella*, *Citrobacter*, *Enterobacter*, *Enterococcus*, *Staphylococcus*,  
176 *Aerococcus*, *Actinobaculum*, *Bifidobacterium*, and *Candida*); 2. select several species of the  
177 Enterobacteriaceae family for quantitative analyses only if evidence of their contributions to a  
178 sample was strong, thus avoiding incorrect peptide-spectral match assignments to orthologs with  
179 high sequence homology; 3. conduct species-specific pan-proteome database searches to assess  
180 whether key proteins were missed by analyzing data from only a single genotype (strain). The  
181 latter was most insightful for *E. coli* due to a high number of sequenced strains and the  
182 identification of plasmid-encoded virulence and antibiotic resistance proteins for all species. The  
183 [Table S3 \(Suppl. Data\)](#) contains the protein sequence databases used for iterative searches to  
184 selectively identify the species for quantitative proteomic analyses applied to all 121 samples,  
185 including 42 collection timepoint-matched UP and CB samples. P3 was excluded from further  
186 analysis due to a low number of samples. Quantified at the microbial species level, the data is  
187 displayed in longitudinal UP and CB sample series in the graphics of [Fig. 3](#). We were confident  
188 that this data accounted for most of the microbial biomasses. Comparisons of equivalent  
189 timepoints (16S rRNA data vs. proteomics) suggest that low abundance microbial constituents  
190 present in samples according to 16S rRNA data were absent in proteomic profiles, consistent with  
191 the notion that lower protein detection limits for such species were reached.

192



193 Microbial *in vitro* culture methods were used to verify species identities and recover isolates for  
194 drug susceptibility tests (DSTs). Specimens were typically stored at -80°C prior to revival of the  
195 microbial strains on media under aerobic growth conditions *in vitro*. A P5 catheter corresponding  
196 to 61UP was also preserved in liquid N<sub>2</sub> after collection and grown anaerobically in rich media, As  
197 reported (31), colonies were subjected to 16S rRNA and proteomic surveys and largely agreed  
198 with the profiles derived from equivalent clinical samples. Lower abundance fastidious bacteria,  
199 such as *Prevotella*, were identified by 16S rRNA sequence analysis from both clinical samples  
200 and colony isolates. This supported the notion that microbes of low abundance in UP and CB  
201 samples were not always in a detectable range for shotgun proteomics. Using frozen specimens  
202 for colony isolation, only species that are viable during extended storage at -80°C were identified.  
203 This included *Serratia marcescens*, *K. pneumoniae*, *S. aureus*, and *E. faecalis* ([Dataset S2](#),  
204 [Suppl. Data](#)) all of which have cell walls encapsulated with protective exopolysaccharides. In  
205 contrast, species that were quite abundant in some clinical specimens, *e.g.* *E. coli* and *A. urinae*,  
206 were not isolated under these conditions.

207

208 Microbial proteins quantified by peptide-spectral counting from all UP and CB samples ([Dataset](#)  
209 [S4, Suppl. Data](#)) were summed at species levels. One fungal species, *Candida albicans*, was  
210 identified in P2 and P9 datasets at low levels. Common bacterial pathogens of the urinary tract  
211 were more persistent in longitudinal profiles than rare pathogens and fastidious anaerobes ([Fig.](#)  
212 [3](#)). *P. mirabilis* was dominant in samples from three patients with salt-encrusted CBs surveyed  
213 over 3.5 to 5.5 months (P4, P6, and P7), but less so in P5 where salt encrustation was observed  
214 for less than half of the samples. Both *P. stuartii* and *E. faecalis* persisted in two of the patient  
215 sample series. Non-encrusted catheters (P1, P2, P8, and P9) were more dynamic in microbial  
216 content of CBs over time. Most prevalent were *P. aeruginosa*, *E. coli* and *E. faecalis*. In the CBs of  
217 P2 that followed three antibiotic treatment courses, *K. pneumoniae* was dominant. Among rare

218 pathogens, *Brevundimonas* (10UP-22UP), *Stenotrophomonas* (71CB), and *Acinetobacter* (5UP)  
219 colonized transiently, whereas *Bordetella hinzii* (10UP-33CB) and *S. marcescens* (15CB-50CB)  
220 displayed higher persistence over time. The box plots in [Figure S5 \(Suppl. Data\)](#) depict variances  
221 in bacterial species abundances comparing UP and CB proteomes in a patient-specific manner.  
222 No statistically significant differences in microbial composition for timepoint-matched UP and CB  
223 datasets were identified. This analysis suggests that the cycle of biofilm formation and dispersal  
224 occurs at the microbial community level. For the most part, UP samples contain those organisms  
225 that dispersed from CBs.

226

227 *Proteomic data allow assessments of strains dominance and microbial adaptation to the catheter*  
228 *biofilm milieu.*

229 Little is known about molecular adaptations of species to the complex microbial environment in  
230 CBs and the presence of the host's immune cells and their effectors at the catheter-urothelial  
231 interface. Furthermore, it was of interest to determine if specific strains of a microbial species were  
232 dominant in a series of samples from a given patient. We investigated these questions patient-  
233 specifically at the proteome level. Statistically significant abundance differences were identified for  
234 664 bacterial proteins (ANOVA tests; [Dataset S6, Suppl. Data](#)). Interpreting all data is beyond this  
235 article's scope. We elaborate on *P. mirabilis*, *E. coli*, and *E. faecalis* because their proteomes  
236 were well-represented in datasets from several patients, with a focus on proteins relevant to  
237 bacterial energy metabolism and interactions with the host environment. HpmA was detected only  
238 in *P. mirabilis* proteomes pertaining to CBs of P7 ([Fig. 4](#)), supporting the notion that this putative  
239 hemolysin is expressed by few uropathogenic *P. mirabilis* strains. High abundance of HpmA in all  
240 P7 datasets suggests that a single *P. mirabilis* strain highly dominates the CB series of P7. A  
241 yersiniabactin-like iron/siderophore receptor (gene locus PMI2596) was abundant in the *P.*  
242 *mirabilis* proteomes of CB samples from P1 and P4, lower in abundance in P5 and absent in P6

243 and P7 samples (Fig. 4). The gene cluster for biosynthesis of yersiniabactin and expression of its  
244 receptor FyuA is considered part of the *E. coli* accessory genome. The abundances of the *E. coli*  
245 proteins FyuA and Irp1 (an enzyme encoded by one gene in this cluster) were also highly variant  
246 and most abundant in P1 and P2 datasets (Fig. 4). Some *E. coli* strains produce another  
247 siderophore, aerobactin, via the system lucA-D. Its receptor lutA (Fig. 4) and the L-lysine 6-  
248 monooxygenase lucD were differentially abundant in the *E. coli* proteomes of P1, P2, P5 and P8.  
249 Box plots displaying the variances of additional proteins involved in TMI uptake pathways among  
250 patients are included in Dataset S6 (Suppl. Data). In support of a single strain's dominance for a  
251 species in the CB series pertaining to a distinct patient, an *E. coli* plasmid-encoded ferric iron  
252 uptake system (UTI89\_P010-P017) and the Hek adhesin factor were identified in multiple samples  
253 from P1 but not in those from any other patient.

254

255 We observed statistically significant abundance differences for bacterial proteins that contribute to  
256 fitness and survival in the human host, including the *P. mirabilis* MR/P fimbriae and the flagellin  
257 FliC (Fig. 4). The mannose-resistant fimbrial protein MrpA adheres to urothelial cells and  
258 catheters. FliC enables cell swarming and likely contributes to the pathogen's spread along  
259 catheter surfaces. MrpA was most abundant in P6, a case associated with very high CB  
260 biomasses and diagnosis of a renal infection. We identified differences in abundance for enzymes  
261 part of energy metabolism pathways in patient-specific proteome comparisons. The anaerobic  
262 respiration pathway Nar/Fdo (*P. mirabilis*), with nitrate as electron acceptor and formate as  
263 electron donor, was much more abundant in CBs from P6 than in CBs from other patients. NarG  
264 profiles are shown in Fig. 4. Abundance profiles were similar for SucA, a 2-oxoglutarate  
265 dehydrogenase subunit part of the citrate cycle. The citrate cycle produces reducing equivalents  
266 for nitrate reductase (Nar). Enzymes of the mixed acid fermentation (MAF) pathway were most  
267 abundant in CBs of P5, P7, and P8. The abundance profile of *P. mirabilis* formate C-

268 acetyltransferase (PflB) is depicted in Fig. 4. Aldehyde-alcohol dehydrogenases (AdhE) of *P.*  
269 *mirabilis* and *E. coli* were also differentially abundant (Dataset S6, Suppl. Data). Fittingly,  
270 fastidious bacteria were high biomass contributors only in samples from P5 (*A. massiliense* and  
271 *Propionimicrobium lymphophilium*) and P8 (*Campylobacter curvus* and *Veillonella parvula*). A  
272 fucose degradation pathway of *E. coli* appeared to be most active in P5 samples, with statistically  
273 significant differences in abundance for FucO, FucU and FucI. Lactaldehyde reductase FucI (Fig.  
274 4) catalyzes the terminal step of anaerobic fucose metabolism. Many proteins with functional and  
275 structural roles in mRNA and protein biosynthesis (*P. mirabilis*, *E. coli*, and *E. faecalis*) had  
276 statistically significant abundance differences comparing the patient groups. In summary, the  
277 differential use of proteins and multi-molecular entities important to maintain the fitness of bacteria  
278 in biofilms (mobility, adhesion, energy metabolism), comparing CB series between patients, is  
279 indicative of adaptations influenced by host and microbial environments.

280

#### 281 Functional correlations among molecular systems involved in TMI acquisition.

282 We assessed whether multi-subunit systems involved in TMI acquisition, often regulated by the  
283 iron starvation-sensing transcription factor Fur, positively correlated in expression levels. The  
284 proteomes of a subset of bacteria sharing CB niches (*E. faecalis*, *A. urinae*, *P. mirabilis*, and *E.*  
285 *coli*) in patients P1, P4, and P5 were targeted. Abundance correlation R-values of TMI acquisition  
286 systems derived from the individual patients' longitudinal CB timepoints were determined. There  
287 were no statistically significant correlations for P4 and P5 data. Strong positive correlations for *P.*  
288 *mirabilis*, *E. coli* and *E. faecalis* TMI acquisition systems, or proteins part of these systems, were  
289 observed for data from P1 (Fig. 5). These systems' abundances did not correlate with that of Fur  
290 itself, as shown for *P. mirabilis* Fur in Fig. 5. This transcription factor activates the expression of  
291 iron acquisition systems via a mechanism not dependent on its own abundance. The correlation  
292 analyses demonstrate that microbial cohabitants jointly respond to the starvation of iron and other

293 metal ions and express a versatile repertoire of proteins dedicated to their extracellular capture  
294 and import into the cell. The summed abundance of *P. mirabilis* ExbB and ExbD, subunits of the  
295 energy-transducing Ton system responsible for the proton motive force-dependent uptake of  
296 TMI/siderophores via TonB-dependent outer membrane receptors, positively correlated in  
297 abundance with the receptors they serve. MR/P fimbriae of *P. mirabilis* (MrpA-H) did not positively  
298 correlate in abundance with any TMI acquisition proteins. Three *E. faecalis* lipoproteins, subunits  
299 of ABC transporters predicted to bind TMIs, were expressed by the strains that cohabitated CBs of  
300 five patients: EF2076, EF0577, and EF3082. The abundances of EfaA (EF2076) varied comparing  
301 the *E. faecalis*-containing CB proteomes from five patients (Fig. 6A) and positively correlated with  
302 those of TMI acquisition systems of *P. mirabilis* and *E. coli* (Fig. 5). The data were similar for the  
303 sum of subunits of the ABC transporter (EfaABC). In a recent study, the system was found to be  
304 required for Mn<sup>2+</sup> import and CAUTI pathogenesis (32). We expressed these *E. faecalis*  
305 lipoproteins recombinantly in *E. coli*, purified them, and determined protein melting profiles (T<sub>m</sub>).  
306 Complex formation with small molecules, e.g. TMIs, stabilizes a protein and increases its T<sub>m</sub>. We  
307 observed that purified EfaA and EF0577 had two T<sub>m</sub> maxima in fluorescent dye-binding  
308 experiments. One T<sub>m</sub> maximum appeared to represent an apoprotein binding a TMI as a cofactor.  
309 Denaturation eliminated this higher T<sub>m</sub> peak, while renaturation in the presence of 50 μM CoCl<sub>2</sub>  
310 resulted in restitution of the high T<sub>m</sub> maxima (Fig. 6). Protein melting profiles for EF3082 did not  
311 display two T<sub>m</sub> peaks for any experimental condition. We infer that EfaA and EF0577 bind one or  
312 more TMIs and facilitate their ABC transport-mediated uptake into the *E. faecalis* cell.

313

#### 314 Chronic innate immune responses result from persistent microbial colonization in all patients.

315 The absence of CAUTI symptoms in recurrently catheterized neurogenic bladder patients does  
316 not suggest absence of innate immune responses and pyuria (7, 28). Longitudinal human  
317 proteomic profiles allowed us to assess patient- and timepoint-specific quantitative differences in

318 the immune responses. First, we quantified relative protein abundances averaged from all 121  
319 samples ([Dataset S4, Suppl. Data](#)). In [Table 1](#), a subset of proteins with either a role in neutrophil-  
320 and eosinophil-mediated immune responses or as a cell biomarker is selected. Hemoglobin is a  
321 urine biomarker of tissue injury in the urethral and bladder mucosa. Hemoglobin subunits, e.g.  
322 HBB ([Table 1](#)), were moderately abundant in most datasets suggesting the occurrence of  
323 microhematuria in catheterized patients. High abundance of neutrophil-enriched and moderate  
324 abundance of eosinophil-enriched effector proteins (MPO, calgranulins and EPX, [Table 1](#)) suggest  
325 that both innate immune cell types infiltrated the urinary tract upon microbial colonization of the  
326 catheters. Based on a panel of cell-specific surface markers, as identified by the HCDM resource  
327 (33), granulocyte (CEACAM8) and neutrophil (CD177) markers were more abundant than B-cell,  
328 T-cell, macrophage and dendritic cell markers ([Table 1](#)). Urothelial umbrella cell surface markers  
329 were of very low abundance compared to keratins, consistent with the occurrence of squamous  
330 urothelial metaplasia and progressing epithelial cell keratinization due to chronic irritation of the  
331 patients' urinary tracts (34). Uroplakin-2 and KRT13 are included in [Table 1](#). Complement system  
332 proteins such as C3 were also abundant, indicative of high activity of this innate immunity branch.  
333 Uromodulin, a protein forming polymerized gel-like aggregates in urine, is abundant regardless of  
334 immune cell infiltration and therefore served to normalize protein abundance for the quantitative  
335 analyses shown in [Fig. 7](#).

336

337 Comparing datasets among the individual patients, we identified statistically significant variances  
338 in abundance for many proteins with functions in innate immunity ([Figure S7, Suppl. Data](#)). MPO  
339 and LTF data are depicted in [Fig. 7A](#). MPO is the main ROS-generating enzyme in neutrophils.  
340 LTF is a multifunctional protein including an iron-sequestering function. Correlation analyses for  
341 numerous neutrophil and eosinophil effectors are displayed in [Fig. 7B](#). This data shows that  
342 subsets of proteins cluster based on known enrichments in a specific type of cell or subcellular

343 organelle: for instance, the eosinophil granule proteins bone marrow proteoglycan PRG2 and EPX  
344 and, as reported in (35), azurophilic granule proteins released by neutrophils: MPO, cathepsin G,  
345 azurocidin, and elastase. Such correlation data support the notion that the effectors contribute to  
346 immune defenses triggered by persistent biofilm formation on catheters. Western blots for MPO,  
347 not normalized for total protein in UP samples, confirm activation of neutrophils in patients in  
348 response to CB formation. MPO blots for selected timepoints pertaining to three patients, shown in  
349 [Fig. 7C](#) (P2-6, P7-55, P4-47), revealed low band intensities. This is consistent with low UP/CB  
350 biomasses for these timepoints ([Fig. 3](#)). Regardless of patient origin, neutrophils infiltrate the  
351 urothelium and release their effectors at the catheter surfaces when they harbor microbial biofilms.

352

353 *Antibiotic drug treatments influence composition and resilience of CBs, with instances of transient*  
354 *and permanent changes.*

355 A wound infection of patient P7 was treated with Bactrim, a combination of sulfamethoxazol and  
356 trimethoprim (TMT), at timepoint 41UP/CB. This treatment was stopped a week prior to timepoint  
357 56UP/CB, resulting in the transient bacterial elimination at timepoint UP/CB55. *P. mirabilis* rapidly  
358 recolonized as shown in [Fig. 3](#). A cohabitant of the P7 CBs, *H. influenzae*, also recurred as a  
359 minor component at post-treatment timepoints. The virulence factor HpmA was highly abundant in  
360 the *P. mirabilis* proteome prior to and after treatment, supporting recurrence of colonization with  
361 the same *P. mirabilis* strain. Disk diffusion DSTs for a bacterial isolate (CB65) from P7 revealed  
362 that it was susceptible to a TMT/sulfonamide combination ([Table 2](#)). Treatment of P9 with  
363 levofloxacin over ten days resulted in reduced microbial biomass at timepoint UP/CB75 and  
364 eliminated *S. marcescens* from the biofilm ([Fig. 3](#)). But *E. faecalis* and *P. aeruginosa* strains  
365 persisted, and *S. aureus* and *C. albicans* emerged as new CB community members at post-  
366 treatment timepoints. Fungal pathogens are not inhibited by fluoroquinolone drugs. We also  
367 isolated a slowly growing *E. faecalis* strain on blood and Mueller-Hinton agar from 74CB. This



368 isolate was indeed resistant to a fluoroquinolone, ciprofloxacin (Table 2). *E. faecalis* has a high  
369 incidence of *parC* and *gyrA* mutations that confer fluoroquinolone resistance in strains causing  
370 UTI (36). We did not identify peptides displaying the common ParC and GyrA amino acid  
371 substitutions. A *S. marcescens* strain isolated from 74CB was susceptible to ciprofloxacin. We  
372 isolated a *S. aureus* strain from 75CB. This isolate was not only resistant to ciprofloxacin but also  
373 to ampicillin and cephaloxin, according to DSTs (Table 2). Several antibiotic drugs were  
374 administered to treat a P2 wound infection, with timepoints ranging from 10UP to 42CB (Fig. 3).  
375 Intravenous cephalosporin treatments eliminated strains of *S. aureus*, *E. faecalis*, *B. scardovii* and  
376 *P. aeruginosa* from the patient's catheters, while *Brevundimonas* and *Bordetella hinzii* strains  
377 were more resilient. Daptomycin treatment diminished the *B. hinzii* colonization burden, from  
378 32CB to 33CB, and *K. pneumoniae* emerged as the dominant species. We did not test the *K.*  
379 *pneumoniae* isolate from 43CB for resistance to daptomycin, a last-resort antibiotic to treat Gram-  
380 positive infections, but DSTs revealed the strain's extended spectrum  $\beta$ -lactam and ciprofloxacin  
381 resistance (Table 2).

382

383 To gain further insights into antibiotic resistances of bacterial isolates observed in the DSTs, pan-  
384 proteome database searches including multiple genotypes for a species and ORFs derived from  
385 plasmids or pathogenicity islands were conducted. Thereby, database searches were expanded to  
386 "accessory proteomes". Bacteria harvested from DST plates and clinical samples were analyzed.  
387 Proteins linked to various modes of antibiotic resistance are listed in Dataset S8 (Suppl. Data).  
388 The *S. aureus* isolate from 75UP (P9) expressed the penicillin-binding protein 2 MecA,  $\beta$ -  
389 lactamase BlaZ and aminoglycoside 4'-adenylyltransferase AadD. Expression of the proteins  
390 matched the strain's reduced sensitivities to ampicillin, cephaloxin and gentamycin, respectively. A  
391 *S. aureus* strain isolated from 53CB (P6), the patient diagnosed with a kidney infection, also  
392 expressed MecA. A *P. mirabilis* isolate from P6 (30CB) expressed aminoglycoside O-

393 phosphotransferase (APH(3')-Ia) and dihydrofolate reductase DfrA17, indicative of resistances to  
394 aminoglycosides and TMT, respectively. The *P. mirabilis* isolate from CB65 (P7) did not express  
395 these proteins. The *E. faecalis* isolate from 74UP expressed a dihydrofolate reductase (DfrE) and  
396 an aminoglycoside O-phosphotransferase (APH (3')-IIIa). DfrE expression explains the observed  
397 TMT resistance (Table 2). In summary, some bacterial pan-proteome analyses corroborated  
398 evidence of single- or multi-drug resistant species co-colonizing patient's catheters.

399

## 400 Discussion.

401 Our systems-level study on biofilms that grow on indwelling catheters of neurogenic  
402 bladder patients generates new insights into CB longitudinal dynamics. Meta-omics data  
403 demonstrate that dominant strains of distinct bacterial species recur in serially replaced catheters  
404 under challenge by the innate immune system and antibiotic drug treatments. Gaining these  
405 insights depends on clinical samples that CAUTI animal models cannot simulate. Such animal  
406 models cannot introduce the polymicrobial mixtures that human CBs are composed of. The range  
407 of micro- to anaerobic growth conditions that, we conclude, affect the CB profiles are impossible to  
408 mimic in CAUTI models. Culture-independent surveys identified many fastidious bacteria in CBs in  
409 the context of CAUTI and CAASB (22, 23, 37). We profiled strictly anaerobic bacteria cohabitating  
410 CBs in 6 of the 8 patients on the proteome level for the first time: *A. massiliense*, *P. lymphophilum*,  
411 *B. scardovii*, *V. parvula*, and *C. curvus*. Fastidious organisms more tolerant of oxygen (*A. urinae*  
412 and *G. sanguinis*) were identified as persistent colonizers of CBs. There is increasing awareness  
413 of the fact that such bacteria are more common causes of UTI and CAUTI in  
414 immunocompromised patients (38-40). The protection a biofilm offers makes it likely that such  
415 bacteria colonize hosts with functional immune systems. There is no evidence that the patients  
416 surveyed here, despite their spinal cord injuries, are immunocompromised. Animal models do not  
417 mimic the sequential replacement of catheters, a clinical need for many neurogenic bladder

418 patients, because of the one-time catheter implantation technique. Low quantities of biological  
419 materials from murine catheters limit experiments requiring > 50  $\mu$ L sample volumes (proteomics,  
420 metabolomics). Differences of murine vs. human urothelial surface markers (18), Toll-like  
421 receptors (41), cytokeratin abundance patterns in urothelial and stratified squamous epithelial  
422 cells (42, 43), and the lack of key innate immune effectors in murine neutrophils (e.g. defensin-1)  
423 encourage clinical investigations to study the crosstalk of polymicrobial biofilms with the host  
424 immune system and to conceptualize new ideas for therapeutic interventions.

425 In partial agreement with studies in which microbial colonization of recurrently catheterized  
426 patients was examined from UP samples (24, 25), we observed long-term bacteriuria for greater  
427 than 90% of the specimens. In agreement with another survey of longitudinally profiled catheter  
428 extracts (26), we observed frequent CB cohabitation by two or more pathogens and altered  
429 microbial community profiles following antibiotic drug treatments. *P. mirabilis*, *K. pneumoniae*, *P.*  
430 *aeruginosa*, *E. coli* and *E. faecalis* were most prevalent and persistent according to our data and  
431 (26). In contrast to the cited studies, we found fastidious bacteria to be common CB cohabitants  
432 derived from chronically catheterized patients. Spinal cord-injured cohorts, used in (25) and our  
433 study, are not associated with any specific subset of uropathogens. We cannot confirm previous  
434 reports where *P. stuartii* was found to be as common a cause of recurrent CAASB as *P. mirabilis*  
435 (24, 25). Our data confirm that *P. mirabilis* strains have significant fitness advantages, resulting in  
436 their persistence in and dominance of CBs, when catheters become encrusted with insoluble  
437 phosphate salts and are used by the bacteria to establish co-aggregates with salts (3, 11, 12, 26).

438 Our UP and CB proteome data strongly support the notion that distinct strains of a given  
439 microbe dominate the CB community of a given patient, as compared to a mixture of strains.  
440 While absolute evidence to back up this claim requires analysis of the strains' genomes in a series  
441 of CBs, which we plan to do in future work, identification of genes not part of a species' core

442 genome in some but not other patients allow this conclusion. For instance, HpmA, a *P. mirabilis*  
443 cytotoxin, was identified only in P7 samples. Nrp (PMI2596-PMI2605), a *P. mirabilis* siderophore  
444 biosynthesis system, was expressed only in P1 and P4, but not in samples from P5, P6, and P7.  
445 An *E. coli* plasmid-encoded ferric iron uptake system (UTI89\_P010-P017) and adhesion factor  
446 Hek were consistently observed in P1 samples but absent in *E. coli* proteomes present in the CBs  
447 of other patients. The *E. coli* aerobactin biosynthesis system luc and its receptor lutA were  
448 abundant in P1, P2 and P5, but not present in samples from P8 and P9. Subunits of the twitching  
449 mobility type IV pilus were identified in CBs that *P. aeruginosa* contributed to in P1, but not in P2,  
450 P8, and P9 samples. The type IV pilus is part of the *P. aeruginosa* accessory genome and itself  
451 facilitates conjugative DNA transfer (44). The *E. coli* aerobactin system and the adhesin Hek were  
452 reported to be expressed by virulent strains that cause urosepsis (45) and neonatal meningitis  
453 (46), respectively. Nrp enzymes synthesize a yersiniabactin-like siderophore. Few *P. mirabilis*  
454 genomes have been sequenced and annotated so that insights into Nrp gene cluster frequency for  
455 clinical strains other than HI4320 (47) are not yet available. Patient-specific identifications of ORFs  
456 considered part of accessory genomes argue in favor of a single dominant genotype (strain) for a  
457 species. But it cannot be ruled out that other strains make minor contributions to the same CBs.  
458 Dominant strains re-colonize catheters that are replaced in patients, either from intracellular or  
459 extracellular urinary tract reservoirs. Intra-urothelial bacterial communities have been described  
460 for *E. coli* and *K. pneumoniae* (48, 49). Our data clearly support re-colonization at the community  
461 level given that the same species recur in longitudinal CB series. That, in turn, points towards  
462 extracellular retention of polymicrobial clusters dispersed from catheter surfaces and persisting in  
463 the urinary tract via mucosal adherence. Important adhesion proteins of Gram-negative bacteria in  
464 the urinary tract are fimbriae which varied in abundance in our datasets. Highly abundant were the  
465 MR/K fimbriae of *K. pneumoniae* (KPN03276-KPN03280 (50)) and MR/P fimbriae of *P. mirabilis*  
466 (PMI0263-PMI0270 (51)). The MrpA variance in abundance across datasets is displayed in [Fig. 4](#).

467 Each species produced ECP-type fimbriae (KPN00290-KPN00295, PMI2997-3003), but in lower  
468 quantities. Fimbriae display phase variation and permit the rapid adaptation to conditions that  
469 foster resilience in the host milieu, including the attachment to biotic surfaces and medical devices  
470 (52, 53). Mannose-resistant MR/K and MR/P fimbriae, as well as the *P. aeruginosa* type IV pilus  
471 (54), are involved in cellular aggregation and biofilm formation. Consistent with our data and the  
472 literature, we conclude that these surface assemblies provide fitness advantages and mediate the  
473 persistence of strains that express them in the catheterized human urinary tract.

474 The proteomic data provided insights into the energy metabolism and transition metal  
475 acquisition of bacterial species simultaneously present in CBs derived from clinical samples, to  
476 our knowledge for the first time. The discussion focuses on *P. mirabilis*, *E. coli*, and *E. faecalis*  
477 because these bacteria formed mixed CB communities recurrently in several patients. Each  
478 species expressed at least two ABC transporters known or predicted to facilitate TMI import. The  
479 Gram-negative species expressed more than one biosynthesis system for siderophores and  
480 TonB-dependent receptors for their uptake when complexing Fe<sup>3+</sup> and other TMIs. We assessed  
481 abundance correlations among the systems that facilitate TMI acquisition (Fig. 5). The  
482 correlations, derived from *P. mirabilis*, *E. coli*, and/or *E. faecalis* over a series of timepoints, were  
483 positive in CB profiles for P1, but not for P4 and P5. We hypothesize that these results reflect  
484 robust, simultaneous growth of the pathogens in P1. Growth requires TMI uptake in a metal ion-  
485 sequestering host milieu. TMIs are incorporated as cofactors or components of cofactors such as  
486 Fe-S and heme into enzymes that support metabolism in the cell, particularly energy metabolism.  
487 Several studies have established links between TMI acquisition in a TMI-starved host milieu and  
488 the expression levels of Fe and Fe-S cluster-harboring enzymes that support the bacterial energy  
489 metabolism (55, 56). Thus, we consider the observed correlation data supportive of active  
490 metabolism and growth in *P. mirabilis*, *E. coli*, and/or *E. faecalis* in P1. They may act cooperatively  
491 and competitively as it pertains to the uptake of TMIs (57). The cellular energy going into the

492 assembly of the TMI acquisition systems in the host environment appears to be high. For  
493 example, the *E. coli* strain in P1 highly expressed systems for aerobactin, yersiniabactin and  
494 enterobactin synthesis and uptake as well as heme uptake. Some of their components correlated  
495 with the abundance of the only characterized *E. faecalis* system for TMI acquisition, EfaABC. This  
496 ABC transporter is regulated by  $Mn^{2+}$  (58) and promotes bacterial growth under  $Mn^{2+}$  starvation  
497 conditions (32). Whether EfaABC can capture  $Mn^{2+}$  or other trace metals from *E. coli* or *P.*  
498 *mirabilis* siderophores or heme complexes remains to be shown. We expressed EfaA and another  
499 *E. faecalis* lipoprotein predicted to be part of an ABC transport system for TMIs (EF0577)  
500 recombinantly. Both proteins revealed biochemical evidence of  $Co^{2+}$  binding *in vitro*. An EfaA  
501 ortholog, PsaA, binds  $Mn^{2+}$  and  $Zn^{2+}$  ions but only transports  $Mn^{2+}$  into the *Streptococcus*  
502 *pneumoniae* cell (59). We hypothesize that the growth states of *P. mirabilis*, *E. coli*, and/or *E.*  
503 *faecalis* in P4 and P5 were variable, perhaps including different levels of quiescence, a known trait  
504 of persister cells in biofilms (60).

505         Furthermore, we hypothesize that communications among cohabitating bacteria affecting  
506 TMI homeostasis occur, a process that has been studied using model systems (57, 61). The  
507 human immune defense system perturbs this homeostasis. We surveyed proteins involved in  
508 sequestration of iron (LTF), zinc (calgranulins), and enterobactin (lipocalin-2). Like antimicrobial  
509 effectors such as the ROS-generating enzymes MPO and defensin-1, the proteins are released by  
510 neutrophils (or eosinophils) and abundant in human proteomes of UP and CB samples (Table 1).  
511 TMI-sequestering proteins starve bacteria of these essential cofactors at the CB-urothelial  
512 interface. At least three Gram-negative species profiled in CBs expressed high quantities of  
513 biosynthetic systems to produce lipocalin-2-insensitive siderophores: *P. aeruginosa* pyoverdin in  
514 P1, *E. coli* aerobactin in P1, P2 and P5, *E. coli* yersiniabactin in P1, P2, and P8; a *P. mirabilis*  
515 yersiniabactin-like siderophore in P1 and P4. Lipocalin-2 insensitivity likely increases the  
516 resilience of strains residing in CBs. Siderophore receptors operate in tandem with a TonB-



517 dependent energy-transducing system (TonB-ExbBD), which provides the energy for the transport  
518 of TMIs across the outer membrane. A single TonB energy-transducing system seems to be  
519 expressed by most Gram-negative bacteria, and the system's structure has been determined (62).  
520 TonB-ExbBD is an important molecular target to discover or design inhibitors. The system may  
521 disable TMI uptake in the human host when infections occur. Chemical compounds were  
522 screened to identify inhibitors of siderophore uptake using *E. coli* and *A. baumannii* TonB strains  
523 (63, 64). Such inhibitors have the potential to strengthen nutritional immunity and may be non-  
524 toxic in mammals given that TonB-ExbBD structures are unique to Gram-negative bacteria.

525 Finally, we observed different outcomes in three cases of systemic antibiotic treatments. Of  
526 note, the antibiotic drugs did not target microbial pathogens present in CBs, but those suspected  
527 to cause a comorbidity, chronic wounds. In P7, the *P. mirabilis* biofilm disappeared during Bactrim  
528 intake, but the strain regrew when antibiotic drug treatment was arrested. A CB isolate from this  
529 patient was sensitive to TMT/sulfanilamide treatment. In P9, a biofilm consisting of *E. faecalis*, *P.*  
530 *aeruginosa*, and *S. marcescens* was exposed to LEV treatment. This resulted in *S. marcescens*  
531 elimination from the biofilm. The other species persisted. *S. aureus* and *C. albicans* joined the  
532 reestablished biofilm. *E. faecalis* and *S. aureus* isolates from relevant CB timepoints were  
533 resistant to the fluoroquinolone CIP. P2 was treated sequentially with three different drugs over six  
534 weeks. Most pathogens were eliminated, but treatments failed to prevent sequential outgrowth of  
535 species not susceptible to the administered drugs, first *B. hinzii* (cephalosporin treatment), then an  
536 ESBL-resistant *K. pneumoniae* strain and *C. albicans* (daptomycin and fluconazole treatments).  
537 Using pan-proteome searches for bacterial isolates grown *in vitro*, we identified proteins that  
538 cause antibiotic drug resistances in UTI and CAUTI pathogens, a serious public health problem  
539 threatening to lead to untreatable infections in the coming decades (65). The *S. aureus* strain from  
540 75CB expressed BlaZ and MecA, proteins induced in expression via cross-talk among regulators  
541 of the corresponding genes (66). Additionally, the anoxic environment in deeper layers of biofilms



542 and quiescence allow bacteria to survive during drug treatments even if the genomes do not  
543 harbor specific antibiotic resistance genes or drug efflux pumps (60). CAASB in chronically  
544 catheterized patients is a difficult medical problem. This study highlights the microbial escape  
545 routes and adaptability of polymicrobial communities formed on a medical device in the human  
546 body, following exposure to antibiotic drugs, nutritional starvation (e.g. oxygen and TMIs) and  
547 antimicrobial effectors of the immune system.

548

## 549 **Methods**

### 550 Ethics Statement.

551 The Southwest Regional Wound Care Center (SRWCC) in Lubbock, Texas, and the J. Craig  
552 Venter Institute (JCVI, Rockville, Maryland) created a human subject protocol and a study consent  
553 form (#56-RW-022), which were approved by the Western Institutional Review Board (WIRB) in  
554 Olympia, Washington, followed by JCVI's IRB in 2013. All human subjects were adults and  
555 provided written consent. The specimens were collected firsthand for the purpose of this study.  
556 There was a medical need to serially replace indwelling Foley catheters in patients due to their  
557 affliction with neurogenic bladder syndrome. Scientists at the JCVI did not have access to data  
558 allowing patient identification. Medical metadata for the subjects were encrypted. Electronic and  
559 printed medical records at the clinical site were retained for 4 years to facilitate the integration of  
560 medical and molecular research data.

561

### 562 Human subjects and study design.

563 Nine human subjects enrolled in this prospective study. They had irreversible spinal cord injuries  
564 (SCIs) and suffered from neurogenic bladder syndrome. Catheter replacement was part of routine  
565 patient care at SRWCC. Medical data included gender, ethnicity, antibiotic use, diagnosis of  
566 chronic wound infections, and diabetes. Facilitated by medical staff, the enrolled subjects provided

567 3 to 15 specimens (urethral catheters and urine from catheter collection bags) collected  
568 longitudinally at the clinic in 1- to 4-week intervals, depending on the number of visits that patients  
569 and physician agreed upon. Catheters were cut into 1-inch pieces, placed in polypropylene tubes  
570 and stored at -20°C, minimizing external contamination by use of gloves and sterile razor blades.  
571 Urine samples were obtained from catheter bag ports swabbed clean with alcohol prior to  
572 collection. Urine aliquots of 20 to 50 ml were stored at -20°C. Infrequent draining of catheter bags  
573 may have allowed some *ex vivo* microbial growth in urine specimens. We assume that the  
574 quantitative ratios of microbes in urine sediments on the collection dates do not reflect those in the  
575 urine excreted over time. Containers in which specimens were stored were kept frozen during  
576 transport and transferred to a -80°C freezer until further use at JCVI.

577

578 *Urine and catheter specimen extraction and protein solubilization for proteomics.*

579 The catheter materials were latex in the case of 8 patients and silicone (patient P7). The pH, color  
580 and turbidity of urine specimens and the crystallization of salts inside and on the surface of  
581 catheter segments were noted. To obtain a urine pellet (UP) from a sample, an aliquot was  
582 thawed, adjusted to 20°C and, if acidic, neutralized with 1 M Tris-HCl (pH 8.1) to a pH of ~ 6.5 to  
583 7.5, and centrifuged at 3,200 × g for 15 minutes. UPs were aliquoted for rDNA and protein  
584 extractions and spare samples in ratios of approximately 10%, 45% and 45%, respectively.  
585 Urethral catheter pieces were extracted in two steps. Submerged in 100 mM sodium acetate (pH  
586 5.5), 20 mM sodium meta-periodate, and 300 mM NaCl, catheter pieces were agitated in an  
587 ultrasonic water bath for 10 min at 20°C. The supernatant was recovered and concentrated. This  
588 was followed by two solubilization cycles of the pellet with a denaturing SED solution (1% SDS  
589 (v/v), 5 mM EDTA and 50 mM DTT) including 3 min heat treatment at 95°C. Two supernatants  
590 were recovered that we termed CB-1 (Na-acetate buffer) and CB-2 (SED solution). The extraction  
591 of UP samples was limited to solubilization in SED solution. Experimental details were described

592 previously (28, 31). All centrifugal centrifugation steps were performed using Ultrafree-4 filter units  
593 (10 kDa MWCO), potentially eliminating small peptides from the concentrates. However, we  
594 determined that peptides with  $M_r$  values lower than 5 kDa (e.g. neutrophil defensin-1; 3-4 kDa)  
595 were partially retained. Processing steps for the solubilized UP and CB samples were based on  
596 the Filter-Aided Sample Preparation (FASP) method (67), adapted by us to the use of 100  $\mu$ g  
597 protein for digestion with sequencing-grade trypsin in 50:1 ratios in Vivacon 10k filters (Sartorius  
598 AG, Germany) (28). FASP-processed peptide mixtures were desalted using the Stage-Tip method  
599 (68) and lyophilized for LC-MS/MS proteomic analysis.

600

#### 601 Shotgun proteomics via LC-MS/MS.

602 Desalted peptide mixtures derived from UP, CB-1, and CB-2 samples were dissolved in 10  $\mu$ l  
603 0.1% formic acid (solvent A) and analyzed using one of two LC-MS/MS systems: (1) a high-  
604 resolution Q-Exactive mass spectrometer (MS) coupled to an Ultimate 3000-nano LC system; (2)  
605 a low-resolution LTQ-Velos Pro ion-trap mass spectrometer coupled to an Easy-nLC II system.  
606 Both systems (Thermo Scientific, San Jose, CA) were equipped with a FLEX nano-electrospray  
607 ion source at the LC-MS interface. Analytic procedures were previously described for the Q-  
608 Exactive (69, 70) and LTQ-Velos Pro (71) platforms. For LTQ-Velos Pro analysis, peptides present  
609 in a sample were trapped on a  $C_{18}$  trap column (100  $\mu$ m  $\times$  2 cm, 5  $\mu$ m pore size, 120  $\text{\AA}$ ) and  
610 separated on a PicoFrit  $C_{18}$  analytical column (75  $\mu$ m  $\times$  15 cm, 3  $\mu$ m pore size, 150  $\text{\AA}$ ) at a flow  
611 rate of 200 nl/min. Starting with solvent A, a linear gradient from 10% to 30% solvent B (0.1%  
612 formic acid in acetonitrile) over 195 minutes was followed by a linear gradient from 30% to 80%  
613 solvent B over 20 min and re-equilibration with solvent A for 5 min. Following each sample, the  
614 columns were washed thrice using a 30-min solvent A to B linear gradient elution to avoid sample  
615 carry-over. For Q-Exactive analysis, LC was conducted as reported earlier (69). Electrospray  
616 ionization was achieved by applying 2.0 kV distally via a liquid junction. Parallel to LC gradient

617 elution, peptide ions were analyzed in a MS<sup>1</sup> data-dependent mode to select ions for MS<sup>2</sup> scans  
618 using the software application XCalibur v2.2 (Thermo Scientific). The fragmentation modes were  
619 collision-induced dissociation (CID) with a normalized collision energy of 35% (LTQ-Velos Pro)  
620 and higher-energy collisional dissociation (HCD) with a normalized collision energy of 27% (Q-  
621 Exactive). Dynamic exclusion was enabled. MS<sup>2</sup> ion scans for the same MS<sup>1</sup> *m/z* value were  
622 repeated once and then excluded from further analysis for 30s. Survey (MS<sup>1</sup>) scans ranged from a  
623 *m/z* range of 380 to 1,800 followed by MS<sup>2</sup> scans for selected precursor ions. Survey scans with  
624 the Q-Exactive were acquired at a resolution of 70,000 (*m/Δm*) with a *m/z* range from 250 to  
625 1,800. MS<sup>2</sup> scans were performed at a resolution of 17,500. The ten most intense ions were  
626 fragmented in each cycle. Ions that were unassigned or had a charge of +1 were rejected from  
627 further analysis. Two or three technical LC-MS/MS replicates were run for UP, CB-1 and CB-2  
628 peptide extracts.

629

630 *Computational proteomic data analyses and proteome quantifications.*

631 The raw MS files were combined for database searches as follows: (1) all technical replicates for a  
632 given UP sample; (2) all replicates from both CB-1 and CB-2 fractions for a given CB sample. The  
633 Sequest HT algorithm integrated in the software tool Proteome Discoverer v1.4 (Thermo  
634 Scientific) was used as the search engine with analytical parameters described previously (69,  
635 70). Only rank-1 peptides with a length of at least seven amino acids were considered. The FDR  
636 rates were estimated using the integrated Percolator tool with a (reverse sequence) decoy  
637 database. Protein hits identified with a 1% FDR threshold were accepted for data interpretation.  
638 The 'protein grouping' function was enabled to ensure that only one protein was reported when  
639 multiple proteins shared a set of identified peptides. The database contents were the reviewed  
640 protein sequence entries in the non-redundant Human UniProt database (release 2015-16; 20,195  
641 sequences) and sequence entries for 23 microbial genomes reported as major causes of UTI (69).

642 Based on 16S rRNA genus assignments and iterative proteomic searches using database subsets  
643 for distinct species part of the same genus, the proteomic searches were customized for the same  
644 series from each patient. Iterative searches followed by database customization were also applied  
645 to samples containing one or potentially more members of the Enterobacteriaceae family. The  
646 entire list of species searched in this process is listed in [Table S3 \(Suppl. Data\)](#). The pan-  
647 proteome database searches for five distinct microbial species were performed by downloading  
648 non-redundant pan-proteome sequence databases from UniProt-Proteome using the Sequest HT  
649 algorithm as mentioned above. MS raw files were deposited in PRIDE (via ProteomeXchange)  
650 with the identifier PXD012048. The sums of peptide-spectral match counts (PSMs) assigned to  
651 each microbial species and *Homo sapiens* were the basis for the individual species-based  
652 quantification in both UP and CB samples. Relative to the total proteome (all PSMs) in a dataset,  
653 normalized abundance values were obtained for all species in the Proteome Discoverer v1.4-  
654 derived dataset. They were the basis of quantitative displays in [Fig. 3](#) and [Figure S5 \(Suppl.](#)  
655 [Data\)](#). For quantitative analyses that assessed protein variances, of human and microbial species  
656 origins, normalization was based on total PSMs of the respective species. This normalization  
657 pertains to proteomic data displayed in [Figs. 4, 5, 6](#) and [7](#), [Table 1](#), [Dataset S6](#) and [Figure S7](#).

658

### 659 Microbiota analyses.

660 Microbial cell lysis and DNA extraction methods from catheter extracts and UP samples (31) and  
661 the amplification of V1-V3 regions of the 16S rDNA bacterial genes as well as sequencing on the  
662 MiSeq sequencer from Illumina Inc. were described previously (72). The UPARSE pipeline for the  
663 phylogenetic analysis was used (73). OTUs were generated *de novo* from raw sequence reads  
664 using default parameters in UPARSE, the Wang classifier and bootstrapping using 100 iterations.  
665 The taxonomies were assigned to the OTUs using Mothur and applying the SILVA 16S rRNA  
666 database version 123 as reference database (74). Unbiased, metadata-independent filtering was

667 applied at each level of the taxonomy by eliminating samples with less than 2000 reads and OTUs  
668 present in less than ten samples. Filtered data were analyzed based on the relative contributions  
669 of microbial genera in a distinct sample. The Shannon index was used to measure the alpha  
670 diversity.

671

#### 672 Microbial cultures.

673 Surviving bacteria present in frozen catheter extracts and UP samples stored at -80°C were  
674 cultured on BHI broth, blood and MacConkey agar plates to isolate strains. Single colonies were  
675 picked, Gram-stained and microscopically assessed before culture stocks were generated either  
676 directly from a plate or a 5-10 mL overnight BHI suspension culture. Stocks were frozen in 10%  
677 glycerol at -80°C. To determine the identity of bacterial species, cell lysis, proteomic sample  
678 processing and database search methods we mentioned in the context of clinical sample analysis  
679 were used. If a dataset suggested impurities, bacterial strains were streaked out again from the  
680 original stock and new colonies were picked and reanalyzed. The OD<sub>600</sub> values reached for *E.*  
681 *faecalis* strains in BHI media were below 0.6, the values for species of the Enterobacteriaceae  
682 family were usually higher than 0.8. Some fastidious bacterial species were isolated and lysed  
683 directly from blood agar plates for proteomic analysis. The isolation of other fastidious bacteria  
684 derived from anaerobic storage in liquid nitrogen and anaerobic culture, without freezing catheter  
685 specimens, was previously reported (31). Further details are provided in [Dataset S2 \(Suppl. Data\)](#).

686

#### 687 Expression vectors, gene cloning, and recombinant protein expression.

688 Two expression vectors were used to clone EF2076, EF0577 and EF3082 (*E. faecalis* V583) into  
689 the *E. coli* strain BL21(DE3)/pMagic (75). The ccdB cassette was inserted into the cloning region  
690 to enhance the efficiency of screening for the correct clone. pMCSG53 encodes the N-terminal  
691 His-tag (75). PCR primers in [Table 3](#) were used to amplify the ORFs excluding export signal

692 sequences. Inserted DNA fragments were prepared using standard PCR protocols using Phusion  
693 polymerase (New England Biolabs). The pMCSG53 vector was linearized by cleavage of the  
694 cloning site with SspI, and PCR products were cloned using the Gibson Assembly method (76)  
695 and transformed into *E. coli* DH5 $\alpha$ . Sequences of the clones were validated by Sanger  
696 sequencing. Their transformation into BL21(DE3)/pMagic was followed by growth at 37 °C in 0.5 L  
697 LB containing 100  $\mu$ g/ml ampicillin to an OD<sub>600</sub> of ~ 0.8 when expression was induced by adding 1  
698 mM IPTG. Following incubation at 20°C for 16-18 hours, the cells were lysed. *E. faecalis* target  
699 proteins were purified on Ni-NTA resin, cleaving the affinity tags with TEV protease as previously  
700 reported (77). Purity and solubility of the purified proteins was assessed by Nu-PAGE.

701

#### 702 Thermal shift assay.

703 Interaction of proteins with a small molecule can increase its stability and the melting temperature  
704 ( $T_m$ ) (78). To denature each of the purified *E. faecalis* proteins, a 1 mg/ml solution was incubated  
705 with 1 ml 6 M guanidine-HCl (pH 8). To renature the protein, 50  $\mu$ l Ni-NTA agarose resin was  
706 added. The suspension was incubated gently agitating at 4°C for 1 h. The flow-through fraction  
707 was discarded. The resin was washed with 8 M urea/PBS, and the protein gradually renatured via  
708 buffer exchange into PBS followed by elution in 50  $\mu$ l of an elution buffer containing 250 mM  
709 imidazole. Renatured proteins were either left in PBS or CoCl<sub>2</sub> was added at a final concentration  
710 of 50  $\mu$ M. Ten  $\mu$ l of a protein preparation (0.5 mg/ml) was placed in a 384-well plate adding 2  $\mu$ l  
711 100X SYPRO Orange. Temperature melting profiles were monitored in a Light Cycler 480 (Roche  
712 Life Science).

713

#### 714 Disk diffusion antibiotic drug susceptibility tests.

715 We followed guidelines from a Manual of Antimicrobial Susceptibility Testing (79) to perform drug  
716 susceptibility tests via disk diffusion. All antibiotics were dissolved as specified by the Korean



717 society of laboratory medicine manual and placed on 0.6 mm disks in concentrations as follows:  
718 Ampicillin (100 µg); Cefotaxime (30 µg); Cephalexin (30 µg); Ciprofloxacin (5 µg);  
719 Sulfanilamide/TMT (200µg/ 12µg); and Gentamycin (30 µg). The McFarland standard (0.5) was  
720 used to adjust bacterial turbidity and plate approximately  $1.5 \times 10^8$  CFU/ml of bacterial inoculum  
721 from a ~ 6h BHI culture (Gram-negative) or a Mueller-Hinton agar plate (Gram-positive).  
722 Clearance zones were measured after 16 hours of growth at 37°C in a 5% CO<sub>2</sub> incubator.

723

#### 724 Statistical analysis methods.

725 To determine statistical changes in taxonomic α-diversity, Wilcoxon rank sum tests were  
726 performed. These tests were also used to assess variation in the abundances of proteins in  
727 proteomic datasets from different patients. Analysis of variance (ANOVA) was used to compare  
728 the variation between patients. We applied a P-value cutoff of 0.05 to determine statistically  
729 significance. The correlation plot was derived from the corrplot package in R, using the Pearson  
730 correlation with a P-value less than 0.05. Box plots with statistically significance data were  
731 generated using ggsignify and ggplots in R.

732

#### 733 **Acknowledgements**

734 This work was supported by the National Institutes of Health grant R01GM103598 titled “Urethral  
735 catheter-associated polybacterial biofilm formation and dispersal”. The funder had no role in study  
736 design, data collection and interpretation, or decisions to submit the work for publication. We  
737 thank the Ruggles Family Foundation for the support in acquiring the Q-Exactive mass  
738 spectrometer.

739

#### 740 **References**

741 1. Foxman B. 2010. The epidemiology of urinary tract infection. Nat Rev Urol 7:653-60.

- 742 2. Saint S, Chenoweth CE. 2003. Biofilms and catheter-associated urinary tract infections. *Infect Dis*  
743 *Clin North Am* 17:411-32.
- 744 3. Stickler DJ. 2008. Bacterial biofilms in patients with indwelling urinary catheters. *Nat Clin Pract Urol*  
745 5:598-608.
- 746 4. Flores-Mireles AL, Walker JN, Caparon M, Hultgren SJ. 2015. Urinary tract infections:  
747 epidemiology, mechanisms of infection and treatment options. *Nat Rev Microbiol* 13:269-84.
- 748 5. Macleod SM, Stickler DJ. 2007. Species interactions in mixed-community crystalline biofilms on  
749 urinary catheters. *J Med Microbiol* 56:1549-57.
- 750 6. Majumder MI, Ahmed T, Hossain D, Begum SA. 2014. Bacteriology and antibiotic sensitivity  
751 patterns of urinary tract infections in a tertiary hospital in Bangladesh. *Mymensingh Med J* 23:99-  
752 104.
- 753 7. Hooton TM, Bradley SF, Cardenas DD, Colgan R, Geerlings SE, Rice JC, Saint S, Schaeffer AJ,  
754 Tambayh PA, Tenke P, Nicolle LE. 2010. Diagnosis, prevention, and treatment of catheter-  
755 associated urinary tract infection in adults: 2009 International Clinical Practice Guidelines from the  
756 Infectious Diseases Society of America. *Clin Infect Dis* 50:625-63.
- 757 8. Boucher HW, Talbot GH, Bradley JS, Edwards JE, Gilbert D, Rice LB, Scheld M, Spellberg B,  
758 Bartlett J. 2009. Bad bugs, no drugs: no ESKAPE! An update from the Infectious Diseases Society  
759 of America. *Clin Infect Dis* 48:1-12.
- 760 9. Nielubowicz GR, Mobley HL. 2010. Host-pathogen interactions in urinary tract infection. *Nat Rev*  
761 *Urol* 7:430-41.
- 762 10. Weichhart T, Haidinger M, Horl WH, Saemann MD. 2008. Current concepts of molecular defence  
763 mechanisms operative during urinary tract infection. *Eur J Clin Invest* 38 Suppl 2:29-38.
- 764 11. Norsworthy AN, Pearson MM. 2017. From Catheter to Kidney Stone: The Uropathogenic Lifestyle  
765 of *Proteus mirabilis*. *Trends Microbiol* 25:304-315.
- 766 12. Schaffer JN, Pearson MM. 2015. *Proteus mirabilis* and Urinary Tract Infections. *Microbiol Spectr* 3.
- 767 13. Haraoka M, Hang L, Frendeus B, Godaly G, Burdick M, Strieter R, Svanborg C. 1999. Neutrophil  
768 recruitment and resistance to urinary tract infection. *J Infect Dis* 180:1220-9.

- 769 14. Yu Y, Kwon K, Tsitrin T, Bekele S, Sikorski P, Nelson KE, Pieper R. 2017. Characterization of  
770 Early-Phase Neutrophil Extracellular Traps in Urinary Tract Infections. *PLoS Pathog* 13:e1006151.
- 771 15. Yu Y, Sikorski P, Smith M, Bowman-Gholston C, Cacciabeve N, Nelson KE, Pieper R. 2017.  
772 Comprehensive Metaproteomic Analyses of Urine in the Presence and Absence of Neutrophil-  
773 Associated Inflammation in the Urinary Tract. *Theranostics* 7:238-252.
- 774 16. Hannan TJ, Roberts PL, Riehl TE, van der Post S, Binkley JM, Schwartz DJ, Miyoshi H, Mack M,  
775 Schwendener RA, Hooton TM, Stappenbeck TS, Hansson GC, Stenson WF, Colonna M, Stapleton  
776 AE, Hultgren SJ. 2014. Inhibition of Cyclooxygenase-2 Prevents Chronic and Recurrent Cystitis.  
777 *EBioMedicine* 1:46-57.
- 778 17. Schreiber HLT, Conover MS, Chou WC, Hibbing ME, Manson AL, Dodson KW, Hannan TJ, Roberts  
779 PL, Stapleton AE, Hooton TM, Livny J, Earl AM, Hultgren SJ. 2017. Bacterial virulence phenotypes  
780 of *Escherichia coli* and host susceptibility determine risk for urinary tract infections. *Sci Transl Med*  
781 9.
- 782 18. Wu XR, Kong XP, Pellicer A, Kreibich G, Sun TT. 2009. Uroplakins in urothelial biology, function,  
783 and disease. *Kidney Int* 75:1153-65.
- 784 19. Nielubowicz GR, Smith SN, Mobley HL. 2010. Zinc uptake contributes to motility and provides a  
785 competitive advantage to *Proteus mirabilis* during experimental urinary tract infection. *Infect Immun*  
786 78:2823-33.
- 787 20. Subashchandrabose S, Mobley HL. 2015. Back to the metal age: battle for metals at the host-  
788 pathogen interface during urinary tract infection. *Metallomics* 7:935-42.
- 789 21. Sabir N, Ikram A, Zaman G, Satti L, Gardezi A, Ahmed A, Ahmed P. 2017. Bacterial biofilm-based  
790 catheter-associated urinary tract infections: Causative pathogens and antibiotic resistance. *Am J*  
791 *Infect Control* 45:1101-1105.
- 792 22. Frank DN, Wilson SS, St Amand AL, Pace NR. 2009. Culture-independent microbiological analysis  
793 of foley urinary catheter biofilms. *PLoS One* 4:e7811.

- 794 23. Xu Y, Moser C, Al-Soud WA, Sorensen S, Hoiby N, Nielsen PH, Thomsen TR. 2012. Culture-  
795 dependent and -independent investigations of microbial diversity on urinary catheters. *J Clin*  
796 *Microbiol* 50:3901-8.
- 797 24. Warren JW, Tenney JH, Hoopes JM, Muncie HL, Anthony WC. 1982. A prospective microbiologic  
798 study of bacteriuria in patients with chronic indwelling urethral catheters. *J Infect Dis* 146:719-23.
- 799 25. Dedeic-Ljubovic A, Hukic M. 2009. Catheter-related urinary tract infection in patients suffering from  
800 spinal cord injuries. *Bosn J Basic Med Sci* 9:2-9.
- 801 26. Mathur S, Suller MT, Stickler DJ, Feneley RC. 2006. Prospective study of individuals with long-term  
802 urinary catheters colonized with *Proteus* species. *BJU Int* 97:121-8.
- 803 27. Rousseau M, Goh HM, Holec S, Albert ML, Williams RB, Ingersoll MA, Kline KA. 2016. Bladder  
804 catheterization increases susceptibility to infection that can be prevented by prophylactic antibiotic  
805 treatment. *JCI Insight* 1:e88178.
- 806 28. Yu Y, Zielinski M, Rolfe M, Kuntz M, Nelson H, Nelson KE, Pieper R. 2015. Similar Neutrophil-  
807 Driven Inflammatory and Antibacterial Activities for Symptomatic and Asymptomatic Bacteriuria in  
808 Elderly Patients. *Infect Immun* doi:IAI.00745-15 [pii]  
809 10.1128/IAI.00745-15.
- 810 29. Jones BD, Mobley HL. 1987. Genetic and biochemical diversity of ureases of *Proteus*, *Providencia*,  
811 and *Morganella* species isolated from urinary tract infection. *Infect Immun* 55:2198-203.
- 812 30. Moustafa A, Li W, Singh H, Moncera KJ, Torralba MG, Yu Y, Manuel O, Biggs W, Venter JC,  
813 Nelson KE, Pieper R, Telenti A. 2018. Microbial metagenome of urinary tract infection. *Sci Rep*  
814 8:4333.
- 815 31. Yu Y, Tsitrin T, Singh H, Doerfert SN, Sizova MV, Epstein SS, Pieper R. 2018. Actinobaculum  
816 massiliense Proteome Profiled in Polymicrobial Urethral Catheter Biofilms. *Proteomes* 6.
- 817 32. Colomer-Winter C, Flores-Mireles AL, Baker SP, Frank KL, Lynch AJL, Hultgren SJ, Kitten T,  
818 Lemos JA. 2018. Manganese acquisition is essential for virulence of *Enterococcus faecalis*. *PLoS*  
819 *Pathog* 14:e1007102.

- 820 33. Council H. 2010. Human Cell Differentiation Molecules abstr 9th International Conference on  
821 Human Leukocyte Differentiation Antigens (HLDA9) Barcelona, 11-13 March 2010. HCDM Council  
822 (Human Cell Differentiation Molecules, Copyright © 2016),
- 823 34. Liang FX, Bosland MC, Huang H, Romih R, Baptiste S, Deng FM, Wu XR, Shapiro E, Sun TT.  
824 2005. Cellular basis of urothelial squamous metaplasia: roles of lineage heterogeneity and cell  
825 replacement. *J Cell Biol* 171:835-44.
- 826 35. Lominadze G, Powell DW, Luerman GC, Link AJ, Ward RA, McLeish KR. 2005. Proteomic analysis  
827 of human neutrophil granules. *Mol Cell Proteomics* 4:1503-21.
- 828 36. Yasufuku T, Shigemura K, Shirakawa T, Matsumoto M, Nakano Y, Tanaka K, Arakawa S,  
829 Kawabata M, Fujisawa M. 2011. Mechanisms of and risk factors for fluoroquinolone resistance in  
830 clinical *Enterococcus faecalis* isolates from patients with urinary tract infections. *J Clin Microbiol*  
831 49:3912-6.
- 832 37. Fouts DE, Pieper R, Szpakowski S, Pohl H, Knoblach S, Suh M-J, Huang S-T, Ljungberg I,  
833 Sprague BM, Lucas SK, Torralba M, Nelson KE, Groah SL. 2012. Integrated next-generation  
834 sequencing of 16S rDNA and metaproteomics differentiate the healthy urine microbiome from  
835 asymptomatic bacteriuria in neuropathic bladder associated with spinal cord injury. *Journal of*  
836 *Translational Medicine* 10:174-174.
- 837 38. Lotte R, Lotte L, Ruimy R. 2016. *Actinotignum schaalii* (formerly *Actinobaculum schaalii*): a newly  
838 recognized pathogen-review of the literature. *Clin Microbiol Infect* 22:28-36.
- 839 39. Takahashi S, Xu C, Sakai T, Fujii K, Nakamura M. 2018. Infective endocarditis following urinary  
840 tract infection caused by *Globicatella sanguinis*. *IDCases* 11:18-21.
- 841 40. Zhang Q, Kwoh C, Attorri S, Clarridge JE, 3rd. 2000. *Aerococcus urinae* in urinary tract infections. *J*  
842 *Clin Microbiol* 38:1703-5.
- 843 41. Mestas J, Hughes CCW. 2004. Of mice and not men: differences between mouse and human  
844 immunology. *Journal of immunology (Baltimore, Md : 1950)* 172:2731-8.

- 845 42. Laguna P, Smedts F, Nordling J, Horn T, Bouchelouche K, Hopman A, de la Rosette J. 2006.  
846 Keratin expression profiling of transitional epithelium in the painful bladder syndrome/interstitial  
847 cystitis. *Am J Clin Pathol* 125:105-10.
- 848 43. Vaidyanathan S, McDicken IW, Ikin AJ, Mansour P, Soni BM, Singh G, Sett P. 2002. A study of  
849 cytokeratin 20 immunostaining in the urothelium of neuropathic bladder of patients with spinal cord  
850 injury. *BMC Urol* 2:7.
- 851 44. Kung VL, Ozer EA, Hauser AR. 2010. The accessory genome of *Pseudomonas aeruginosa*.  
852 *Microbiol Mol Biol Rev* 74:621-41.
- 853 45. Johnson JR, Moseley SL, Roberts PL, Stamm WE. 1988. Aerobactin and other virulence factor  
854 genes among strains of *Escherichia coli* causing urosepsis: association with patient characteristics.  
855 *Infect Immun* 56:405-12.
- 856 46. Fagan RP, Smith SG. 2007. The Hek outer membrane protein of *Escherichia coli* is an auto-  
857 aggregating adhesin and invasin. *FEMS Microbiol Lett* 269:248-55.
- 858 47. Himpel SD, Pearson MM, Arewang CJ, Nusca TD, Sherman DH, Mobley HL. 2010. Proteobactin  
859 and a yersiniabactin-related siderophore mediate iron acquisition in *Proteus mirabilis*. *Mol Microbiol*  
860 *78:138-57*.
- 861 48. Rosen DA, Hooton TM, Stamm WE, Humphrey PA, Hultgren SJ. 2007. Detection of intracellular  
862 bacterial communities in human urinary tract infection. *PLoS Med* 4:e329.
- 863 49. Rosen DA, Pinkner JS, Jones JM, Walker JN, Clegg S, Hultgren SJ. 2008. Utilization of an  
864 intracellular bacterial community pathway in *Klebsiella pneumoniae* urinary tract infection and the  
865 effects of FimK on type 1 pilus expression. *Infect Immun* 76:3337-45.
- 866 50. Murphy CN, Mortensen MS, Krogfelt KA, Clegg S. 2013. Role of *Klebsiella pneumoniae* type 1 and  
867 type 3 fimbriae in colonizing silicone tubes implanted into the bladders of mice as a model of  
868 catheter-associated urinary tract infections. *Infect Immun* 81:3009-17.
- 869 51. Zhao H, Li X, Johnson DE, Blomfield I, Mobley HL. 1997. In vivo phase variation of MR/P fimbrial  
870 gene expression in *Proteus mirabilis* infecting the urinary tract. *Mol Microbiol* 23:1009-19.

- 871 52. Jacobsen SM, Stickler DJ, Mobley HL, Shirtliff ME. 2008. Complicated catheter-associated urinary  
872 tract infections due to *Escherichia coli* and *Proteus mirabilis*. *Clin Microbiol Rev* 21:26-59.
- 873 53. van der Woude MW, Baumberg AJ. 2004. Phase and antigenic variation in bacteria. *Clin Microbiol*  
874 *Rev* 17:581-611, table of contents.
- 875 54. O'Toole GA, Kolter R. 1998. Flagellar and twitching motility are necessary for *Pseudomonas*  
876 *aeruginosa* biofilm development. *Mol Microbiol* 30:295-304.
- 877 55. Miller HK, Auerbuch V. 2015. Bacterial iron-sulfur cluster sensors in mammalian pathogens.  
878 *Metallomics* 7:943-56.
- 879 56. Pieper R, Fisher CR, Suh MJ, Huang ST, Parmar P, Payne SM. 2013. Analysis of the proteome of  
880 intracellular *Shigella flexneri* reveals pathways important for intracellular growth. *Infect Immun*  
881 81:4635-48.
- 882 57. Griffin AS, West SA, Buckling A. 2004. Cooperation and competition in pathogenic bacteria. *Nature*  
883 430:1024-7.
- 884 58. Low YL, Jakubovics NS, Flatman JC, Jenkinson HF, Smith AW. 2003. Manganese-dependent  
885 regulation of the endocarditis-associated virulence factor EfaA of *Enterococcus faecalis*. *J Med*  
886 *Microbiol* 52:113-9.
- 887 59. Dintilhac A, Alloing G, Granadel C, Claverys JP. 1997. Competence and virulence of *Streptococcus*  
888 *pneumoniae*: Adc and PsaA mutants exhibit a requirement for Zn and Mn resulting from inactivation  
889 of putative ABC metal permeases. *Mol Microbiol* 25:727-39.
- 890 60. Lewis K. 2010. Persister cells. *Annu Rev Microbiol* 64:357-72.
- 891 61. Harrison F, Buckling A. 2009. Siderophore production and biofilm formation as linked social traits.  
892 *ISME J* 3:632-4.
- 893 62. Celia H, Noinaj N, Zakharov SD, Bordignon E, Botos I, Santamaria M, Barnard TJ, Cramer WA,  
894 Llobes R, Buchanan SK. 2016. Structural insight into the role of the Ton complex in energy  
895 transduction. *Nature* 538:60-65.



- 896 63. Nairn BL, Eliasson OS, Hyder DR, Long NJ, Majumdar A, Chakravorty S, McDonald P, Roy A,  
897 Newton SM, Klebba PE. 2017. Fluorescence High-Throughput Screening for Inhibitors of TonB  
898 Action. *J Bacteriol* 199.
- 899 64. Yep A, McQuade T, Kirchhoff P, Larsen M, Mobley HL. 2014. Inhibitors of TonB function identified  
900 by a high-throughput screen for inhibitors of iron acquisition in uropathogenic *Escherichia coli*  
901 CFT073. *MBio* 5:e01089-13.
- 902 65. Mazzariol A, Bazaj A, Cornaglia G. 2017. Multi-drug-resistant Gram-negative bacteria causing  
903 urinary tract infections: a review. *J Chemother* 29:2-9.
- 904 66. Arede P, Ministro J, Oliveira DC. 2013. Redefining the role of the beta-lactamase locus in  
905 methicillin-resistant *Staphylococcus aureus*: beta-lactamase regulators disrupt the Mecl-mediated  
906 strong repression on *mecA* and optimize the phenotypic expression of resistance in strains with  
907 constitutive *mecA* expression. *Antimicrob Agents Chemother* 57:3037-45.
- 908 67. Wisniewski JR, Zougman A, Nagaraj N, Mann M. 2009. Universal sample preparation method for  
909 proteome analysis. *Nat Methods* 6:359-62.
- 910 68. Yu Y, Smith M, Pieper R. 2014. A spinnable and automatable StageTip for high throughput peptide  
911 desalting and proteomics. *Protocol Exchange*.  
912 doi:10.1038/protex.2014.1033(doi:doi:10.1038/protex.2014.1033).
- 913 69. Yu Y, Sikorski P, Bowman-Gholston C, Cacciabeve N, Nelson KE, Pieper R. 2015. Diagnosing  
914 inflammation and infection in the urinary system via proteomics. *J Transl Med* 13:111.
- 915 70. Yu Y, Suh MJ, Sikorski P, Kwon K, Nelson KE, Pieper R. 2014. Urine sample preparation in 96-well  
916 filter plates for quantitative clinical proteomics. *Anal Chem* 86:5470-7.
- 917 71. Suh MJ, Tovchigrechko A, Thovarai V, Rolfe MA, Torralba MG, Wang J, Adkins JN, Webb-  
918 Robertson BJ, Osborne W, Cogen FR, Kaplowitz PB, Metz TO, Nelson KE, Madupu R, Pieper R.  
919 2015. Quantitative Differences in the Urinary Proteome of Siblings Discordant for Type 1 Diabetes  
920 Include Lysosomal Enzymes. *J Proteome Res* 14:3123-35.
- 921 72. Singh H, Yu Y, Suh MJ, Torralba MG, Stenzel RD, Tovchigrechko A, Thovarai V, Harkins DM,  
922 Rajagopala SV, Osborne W, Cogen FR, Kaplowitz PB, Nelson KE, Madupu R, Pieper R. 2017.

- 923 Type 1 Diabetes: Urinary Proteomics and Protein Network Analysis Support Perturbation of  
924 Lysosomal Function. *Theranostics* 7:2704-2717.
- 925 73. Edgar RC. 2013. UPARSE: highly accurate OTU sequences from microbial amplicon reads. *Nat*  
926 *Methods* 10:996-8.
- 927 74. Quast C, Pruesse E, Yilmaz P, Gerken J, Schweer T, Yarza P, Peplies J, Glockner FO. 2013. The  
928 SILVA ribosomal RNA gene database project: improved data processing and web-based tools.  
929 *Nucleic Acids Res* 41:D590-6.
- 930 75. Eschenfeldt WH, Makowska-Grzyska M, Stols L, Donnelly MI, Jedrzejczak R, Joachimiak A. 2013.  
931 New LIC vectors for production of proteins from genes containing rare codons. *J Struct Funct*  
932 *Genomics* 14:135-44.
- 933 76. Gibson DG, Young L, Chuang RY, Venter JC, Hutchison CA, 3rd, Smith HO. 2009. Enzymatic  
934 assembly of DNA molecules up to several hundred kilobases. *Nat Methods* 6:343-5.
- 935 77. Kwon K, Hasseman J, Latham S, Grose C, Do Y, Fleischmann RD, Pieper R, Peterson SN. 2011.  
936 Recombinant expression and functional analysis of proteases from *Streptococcus pneumoniae*,  
937 *Bacillus anthracis*, and *Yersinia pestis*. *BMC Biochem* 12:17.
- 938 78. Matulis D, Kranz JK, Salemme FR, Todd MJ. 2005. Thermodynamic stability of carbonic anhydrase:  
939 measurements of binding affinity and stoichiometry using ThermoFluor. *Biochemistry* 44:5258-66.
- 940 79. Stephen J. Cavalieri IDR, Ronald J. Harbeck, Robert L. Sautter, Yvette S. McCarter, Susan E.  
941 Sharp, José H. Ortez, Carol A. Spiegel. 2005. Manual of antimicrobial susceptibility testing.  
942 American Society for Microbiology, Washington D.C.
- 943

## 944 **Figure legends**

945 **Fig. 1.** Variances in CB biomasses presented separately for each patient in box plots. We use the same  
946 patient identifiers (P1 through P9) in the main text, other Figures, and Suppl. Datasets. P3 was not  
947 included because only two data points were available. (m) male, (f) female. Biomass (abundance) pertains  
948 to wet pellet weights in  $g \times 10^{-2}$  for ~ 1.5-inch catheter pieces. The CB extracts were washed in PBS, thus  
949 dissolving salt crystals that did not contribute to pellet weights. The horizontal bars depict statistically

950 significant weight differences comparing datasets from individual patients. Significance levels are coded  
951 \*\*\*=0.001, \*\*=0.01, and \*=0.05, using the Wilcoxon rank sum test.

952 **Fig. 2.** Bacterial alpha-diversity using calculations based on the Shannon index. The Shannon index  
953 accounts for abundance and evenness of OTUs. NE and SE: non-encrusted and salt-encrusted biofilms,  
954 respectively. 16S rDNA data for UP and CB samples derived from the same timepoint were separate  
955 entries. NE and SE diversities were statistically different based on a Wilcoxon rank sum test (P-value <  
956 0.05).

957 **Fig. 3.** Quantitatively represented microbial species according to metaproteomic data for CB and  
958 associated UP samples. **A.** P1-P9, no evidence of salt crystals on catheter surfaces and in urine. **B.** P4-P7,  
959 evidence of salt crystals on catheters and in urine. The bars are ordered from the first to last collection time  
960 point (left to right). Collection time-matched CB and UP samples have the same number. The colored  
961 segments of bars represent the abundances of microbial species, based on the sum of their PSMs relative  
962 to the entire proteome identified from a sample. Horizontal bars at the top show the time frame of sample  
963 collection. Vertical hatched bars separate UP from CB sample sets. Inserts display the times during which  
964 antibiotics were administrated systemically (*BAC*, Bactrim; *CEF*, cefaroline-fosamil; *DAP*, daptomycin, *FLU*,  
965 fluconazole, *LEV*, levofloxacin).

966 **Fig. 4.** Variances in abundance for *P. mirabilis* (Pm) and *E. coli* (Ec) proteins. Proteins are listed with a  
967 short name or gene locus. Locus and conserved sequence data predict the siderophore receptor role of  
968 PMI2596. Statistical significance of protein variances is depicted by horizontal bars at the top of each box  
969 plot. The significance levels are coded as \*\*\*=0.001, \*\*=0.01, and \*=0.05. The Wilcoxon rank sum test was  
970 used to determine statistically significant differences in patient-to-patient comparisons (p-value < 0.05).

971 **Fig. 5.** Abundance correlations of proteins and molecular systems involved in TMI acquisition. The data  
972 pertain to eight CB proteomes derived from P1. The bacterial species are Ef: *E. faecalis*; Pm: *P. mirabilis*;  
973 and Ec: *E. coli*. Correlations were determined using the Pearson correlation method. Color intensity and  
974 size of the circles are proportional to the correlation coefficients. Proteins are listed with UniProt short  
975 names or gene loci.

976 **Fig. 6.** Studies on two predicted TMI-binding *E. faecalis* lipoproteins. **A.** EfaA abundance levels comparing  
 977 CB data from five patients (see also legend, Fig. 4). Protein melting profiles ( $T_m$ ) for **B.** EfaA and **C.**  
 978 EF0577 binding SYPRO Orange for detection using the Light Cycler 480. Recombinant proteins (12.5  $\mu$ M)  
 979 were equilibrated in PBS containing 1 mM DTT.  $T_m$  profiles are shown for purified proteins (blue), proteins  
 980 denatured with 6 M guanidine-HCl and washed with 8 M Urea to remove potential bound cofactors followed  
 981 by renaturation with PBS (orange) or  $\text{CoCl}_2$ /PBS (grey) on a Ni-NTA agarose column. The concentrations  
 982 of SYPRO Orange and  $\text{CoCl}_2$ , where applicable, were 8.3X and 50  $\mu$ M, respectively.

983 **Fig. 7.** Neutrophil and eosinophil infiltration in response to persistent catheter colonization. **A.** Variation in  
 984 MPO (PERM) and LTF (TRFL) abundance profiles for eight patients. Wilcoxon rank sum tests were used to  
 985 assess variance. Statistically significant differences pertained to patient-to-patient comparisons ( $p$ -value <  
 986 0.05). **B.** Correlation analyses of neutrophil and eosinophil proteins were determined using the Pearson  
 987 correlation method. Coloration is proportional to the correlation coefficients, and blank squares represent  
 988 non-significant correlation ( $P$ -value < 0.05). Distinct clusters are boxed: this includes eosinophil peroxidase  
 989 (PERE) and bone marrow proteoglycan PRG2; MPO and LTF clustered with cathepsin G (CATG), elastase  
 990 (ELNE), and azurocidin (CAP7). **C.** MPO western blot data for samples derived from seven patients. Lane  
 991 identifiers match UP sample identifiers also used in Fig. 3. Lane identifiers 40 (in P4 gel), 30 (in P5 gel) and  
 992 6 (in P6 gel) are not part of these patients' sample series. A The dominant 55 kDa band represents the  
 993 processed MPO heavy chain (amino acid residues 279-745). Two patient 8 samples have a strong 20 kDa  
 994 band, a fragment representing a C-terminal MPO fragment (the antibody is specific for a peptide sequence  
 995 near the C-terminus). The protein loading is not normalized for uromodulin content. Therefore, staining  
 996 intensities do not allow direct quantitative comparisons.  $M_r$  standards (St) in gels from top to bottom are:  
 997 100, 75, 50, 37, 25, and 20 kDa.

998 **Table 1.** Selected proteins representing different cell types and functions in innate immunity

| UniProt ID | Rk'No. | $A_{\text{Avg}}^2$ | Protein name                            | Functional and cell surface biomarker roles for proteins <sup>3</sup> |
|------------|--------|--------------------|-----------------------------------------|-----------------------------------------------------------------------|
| P07911     | 1      | 3.05               | Uromodulin (UMOD)                       | secreted from renal tubular cells into urine                          |
| P02788     | 2      | 2.02               | Lactotransferrin (LTF)                  | abundant in activated neutrophils, iron-sequestering                  |
| P05164     | 4      | 1.55               | Myeloperoxidase (MPO)                   | abundant in activated neutrophils (azurophilic granules)              |
| P13646     | 5      | 1.50               | Keratin, type I cytoskeletal 13 (KRT13) | abundant in stratified squamous epithelial cells                      |
| P01024     | 7      | 1.32               | Complement system component C3          | abundant effector of the complement system                            |
| P06702     | 10     | 0.89               | Protein S100-A9 (calgranulin)           | abundant in activated neutrophils, $\text{Zn}^{2+}$ sequestering      |

|        |      |       |                                                                     |                                                                                            |
|--------|------|-------|---------------------------------------------------------------------|--------------------------------------------------------------------------------------------|
| P05109 | 32   | 0.45  | Protein S100-A8 (calgranulin)                                       | abundant in activated neutrophils, Zn <sup>2+</sup> sequestering                           |
| P68871 | 46   | 0.33  | Hemoglobin subunit beta (HBB)                                       | abundant in erythrocytes                                                                   |
| P11678 | 51   | 0.28  | Eosinophil peroxidase (EPX)                                         | abundant in activated eosinophils (secreted granules)                                      |
| P80188 | 92   | 0.14  | Lipocalin-2 (LCN2)                                                  | abundant in activated neutrophils (gelatinase granules)                                    |
| P31997 | 252  | 0.04  | Carcinoembryonic antigen-related cell adhesion molecule 8 (CEACAM8) | granulocyte cell-specific surface marker <sup>3</sup>                                      |
| Q8N6Q3 | 421  | 0.02  | CD177 antigen (CD177)                                               | neutrophil cell-specific granule and surface marker <sup>3</sup>                           |
| P20702 | 769  | 0.01  | Integrin alpha-X (ITGAX)                                            | T-cell, B-cell, NK-cell, DC, MAC/monocyte, granulocyte cell-specific marker <sup>3,4</sup> |
| P16422 | 940  | <0.01 | Epithelial cell adhesion molecule (EPCAM)                           | epithelial cell specific marker <sup>3</sup>                                               |
| O00526 | 2484 | <0.01 | Uroplakin-2                                                         | urothelial umbrella cell-specific marker (bladder)                                         |
| P09693 | 4898 | <0.01 | T-cell surface glycoprotein CD3 $\gamma$ chain                      | T-cell-specific surface marker <sup>3</sup>                                                |
| P20138 | 8191 | <0.01 | Myeloid cell surface antigen CD33                                   | DC, granulocyte, MAC/monocyte, stem cell marker <sup>3,4</sup>                             |
| P15391 | 8238 | <0.01 | B-lymphocyte antigen CD19                                           | B cell, DC and stem cell surface marker <sup>3,4</sup>                                     |

999 <sup>1</sup>Normalized abundance rank and <sup>2</sup>Normalized relative protein quantity average from all UP and CB datasets (the PSMs matched  
 1000 to a protein divided by the sum of all human PSMs); <sup>3</sup>Cell differentiation marker according to (33); <sup>4</sup>abbr.: DC, dendritic cells; MAC:  
 1001 macrophages; NK, natural killer cells;

1002 **Table 2. Antimicrobial drug resistance of bacterial strains isolated from P1, P2, P7 and P9**

| Bacterial species         | Sample source | Ampicillin<br>100 $\mu$ g | Cefotaxime<br>30 $\mu$ g | Cephalexin<br>30 $\mu$ g | Ciprofloxacin<br>5 $\mu$ g | Sulfanilamide /<br>TMT 200 $\mu$ g/ 12 $\mu$ g | Gentamycin<br>30 $\mu$ g |
|---------------------------|---------------|---------------------------|--------------------------|--------------------------|----------------------------|------------------------------------------------|--------------------------|
| <i>P. aeruginosa</i> (P1) | 19CB          | 0.6                       | NP                       | NP                       | 2.7                        | 0.6                                            | NP                       |
| <i>K. pneumoniae</i> (P2) | 43CB          | 0.6                       | 0.6                      | NP                       | 0.6                        | NP                                             | 1.4                      |
| <i>P. mirabilis</i> (P7)  | 65CB          | 2.2                       | NP                       | 2.4                      | 2.1                        | 2.0                                            | 1.0                      |
| <i>S. marcescens</i> (P9) | 74UP          | 2.2                       | NP                       | NP                       | 2.2                        | 1.9                                            | NP                       |
| <i>E. faecalis</i> (P9)   | 74UP          | 2.0                       | NP                       | 0.6                      | 0.6                        | 0.6                                            | NP                       |
| <i>S. aureus</i> (P9)     | 75UP          | 1.1                       | NP                       | 0.8                      | 0.6                        | 3.2                                            | 1.6                      |

1003 All disk diffusion tests were performed in three replicates using Mueller-Hinton agar. The *E. faecalis* isolate was also grown on  
 1004 blood agar yielding the same results. The data provided here are growth clearance zones in cm (disk diameter 0.6 cm). Abbr: P:  
 1005 patient; NP: susceptibility tests were not performed. TMT: trimethoprim.

1006 **Table 3. Sequences of PCR primers**

| Gene Name | Signal peptide | Primers |                                                          |
|-----------|----------------|---------|----------------------------------------------------------|
| EF_3082   | 1-31           | Forward | 5'-CGAGAACCTGTA CTTC CAATCCAATGCAACAACAGAAACAACAGCTA     |
|           |                | Reverse | 5'-TTCGGATCCGTTATCCACTTCCAATTTACTCTAATCCTTTTTTAACATCTTC  |
| EF_0577   | 1-26           | Forward | 5'-CGAGAACCTGTA CTTC CAATCCAATACAAATAGTAAAGACAAAGATACAGT |
|           |                | Reverse | 5'-TTCGGATCCGTTATCCACTTCCAATTTATTTTCGAAAGGCCTTCAGCA      |
| EF_2076   | 1-24           | Forward | 5'-CGAGAACCTGTA CTTC CAATCCAATGCTGAAAAGAAAGAAAATTAGCAATT |
|           |                | Reverse | 5'-TTCGGATCCGTTATCCACTTCCAATTTATTTACTCATTAAAGCCATCATGG   |

1007

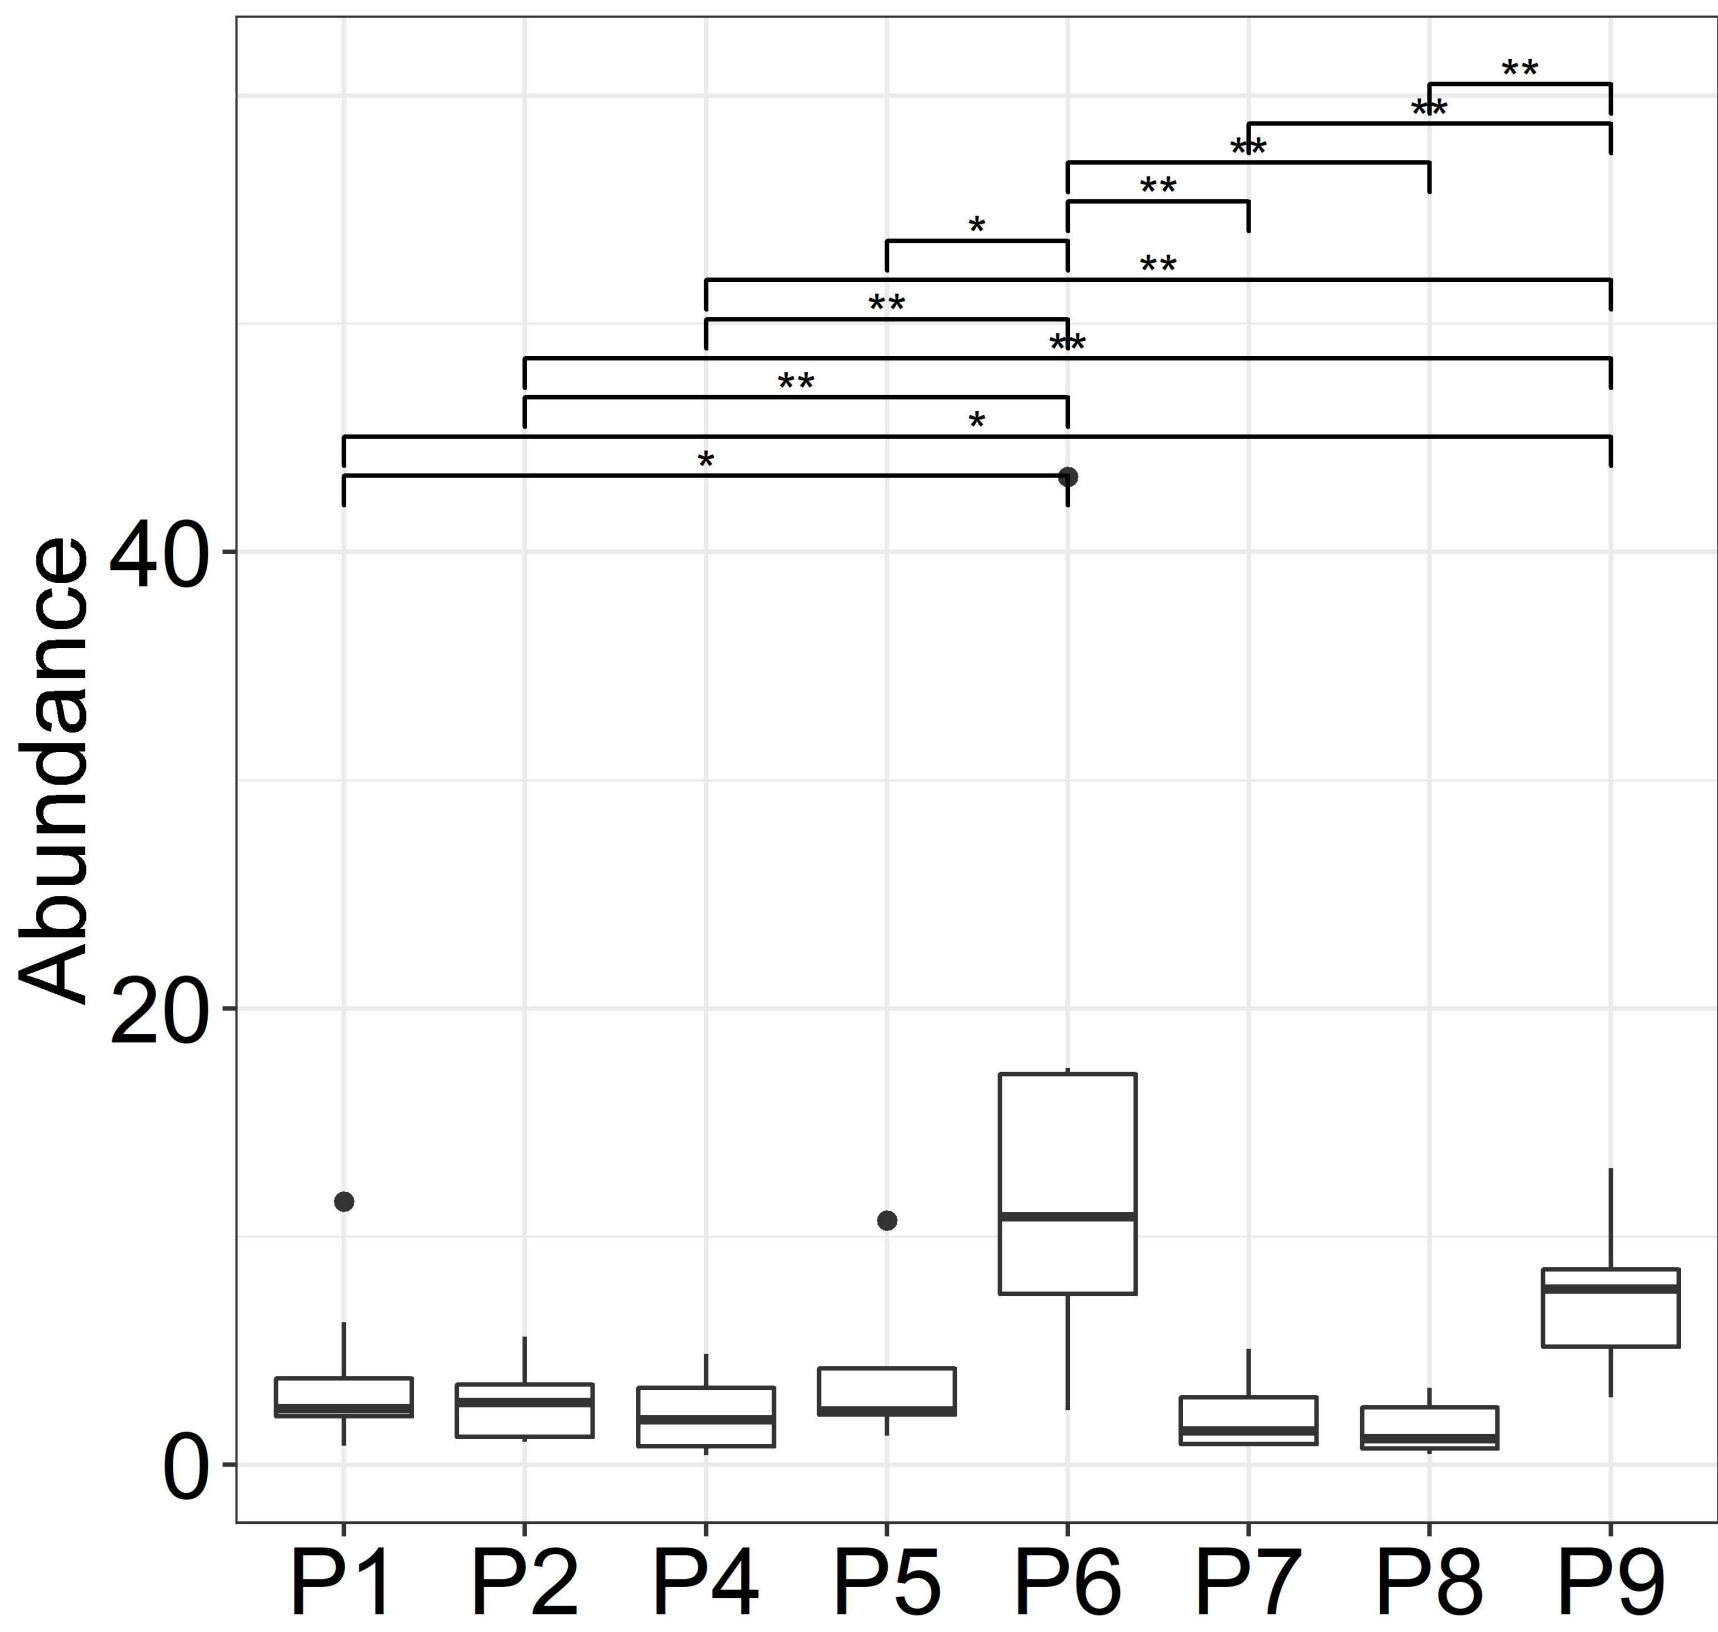

## Shannon

Alpha Diversity Measure

2.0  
1.5  
1.0  
0.5  
0.0

NE

SE

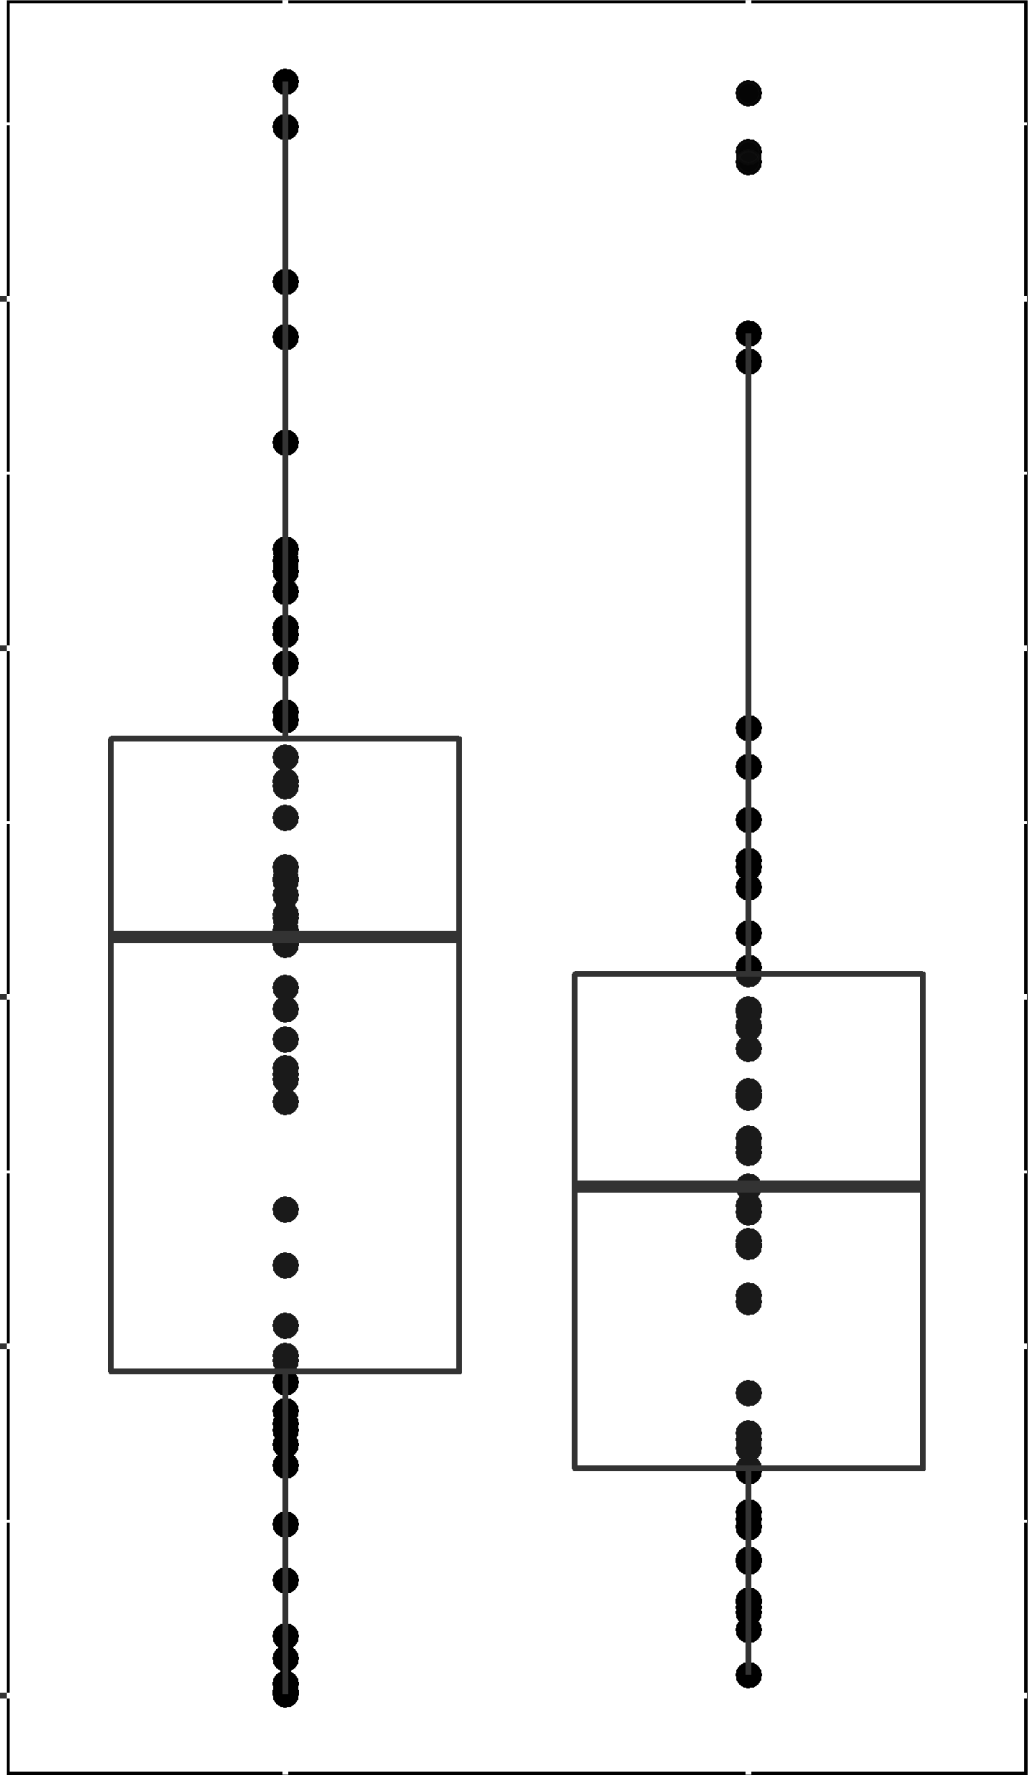





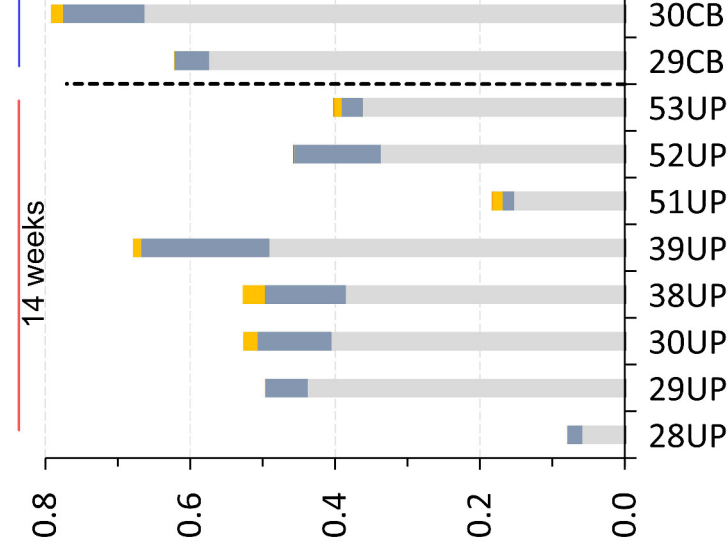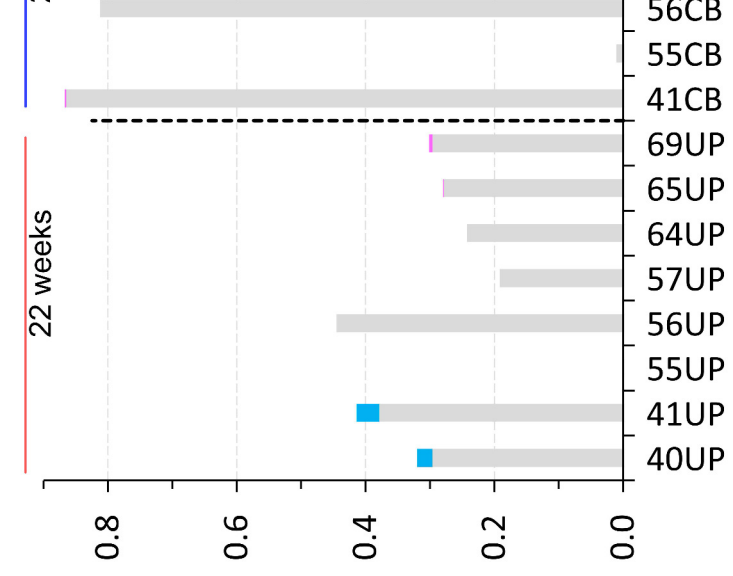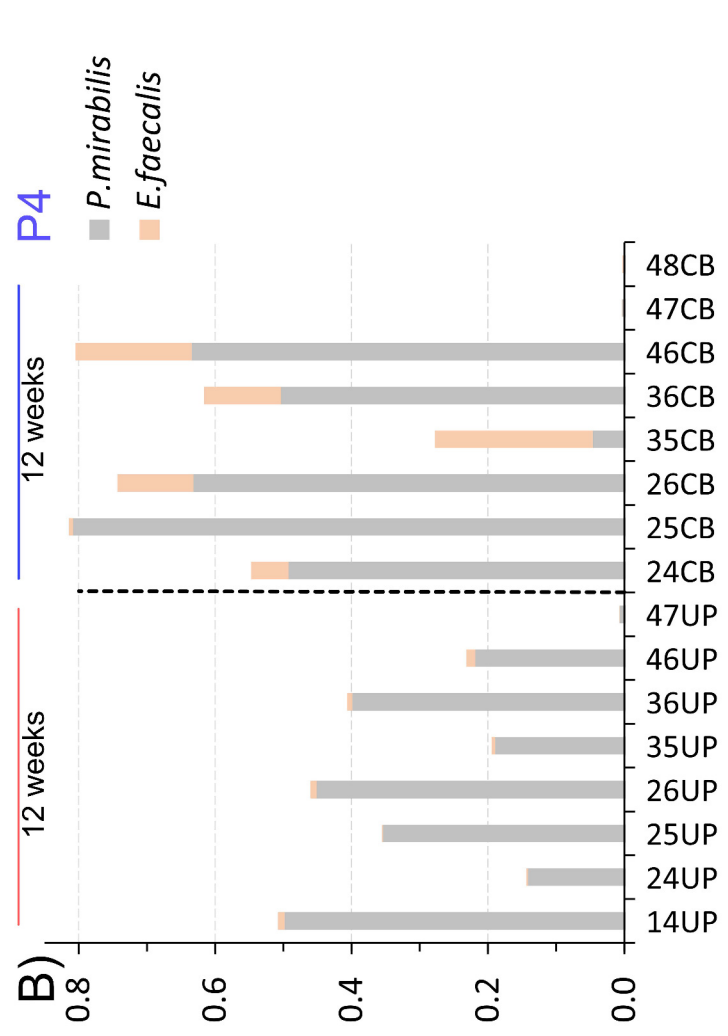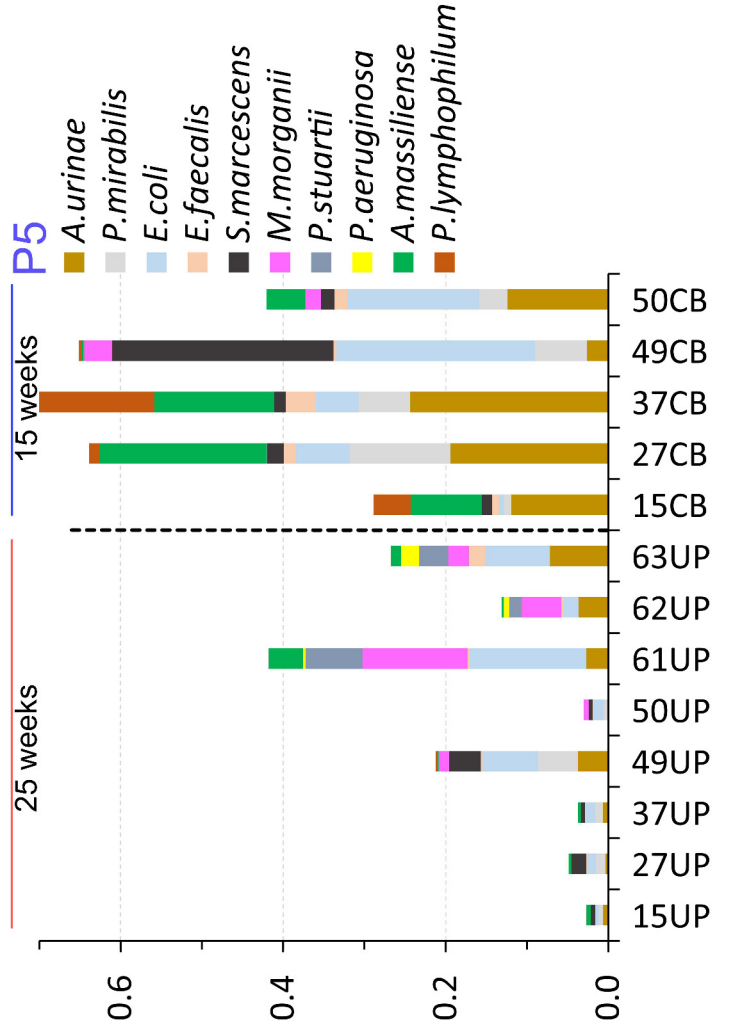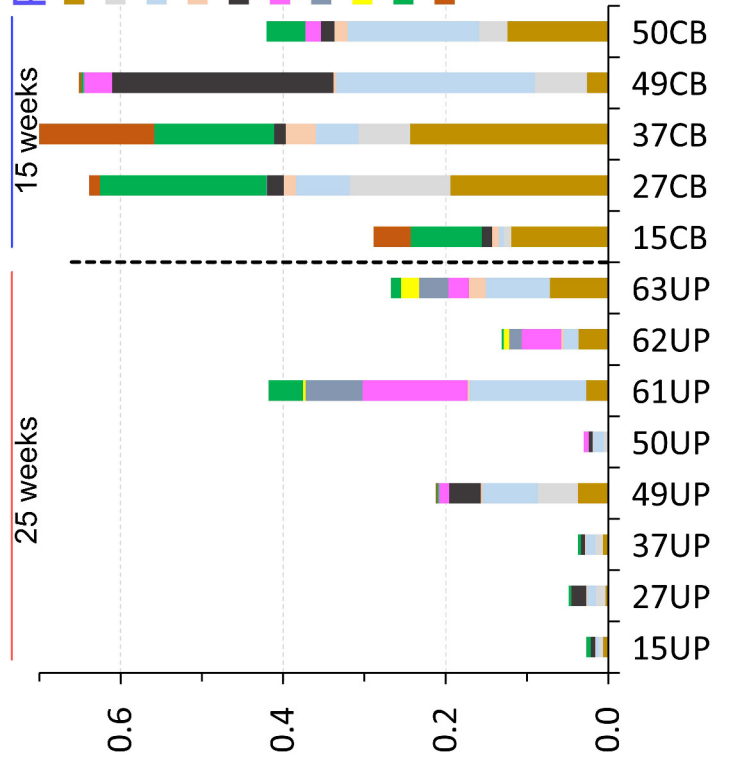

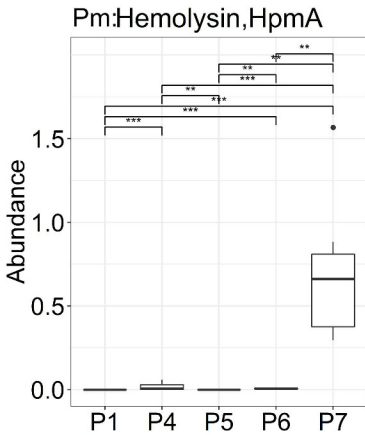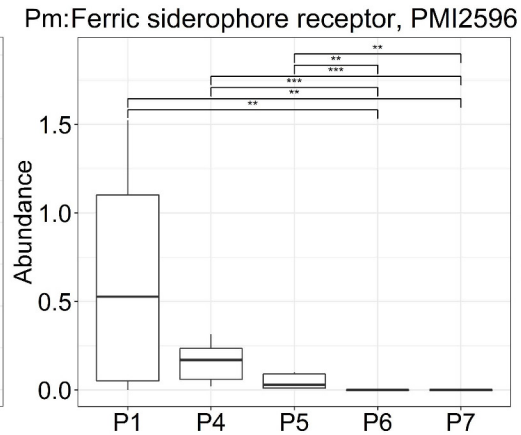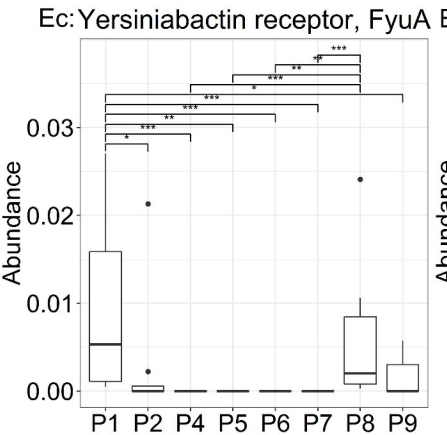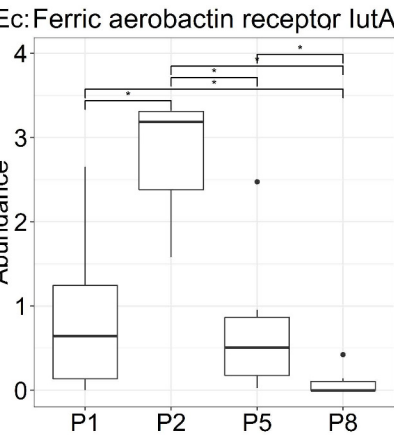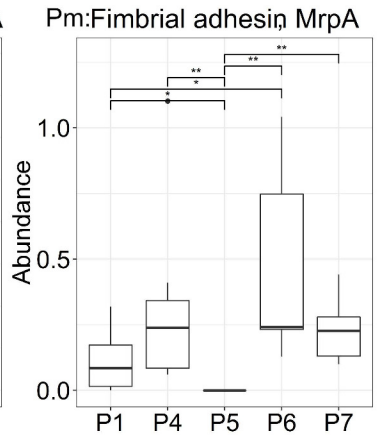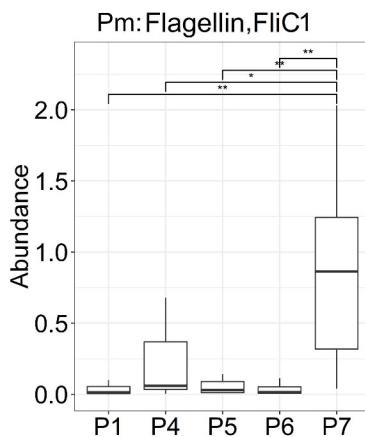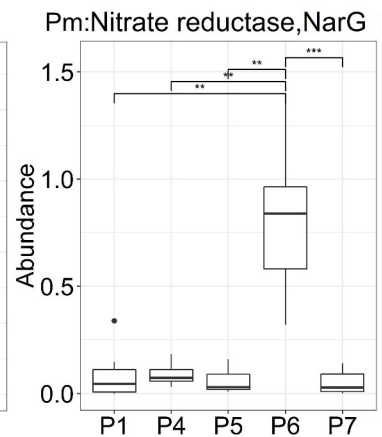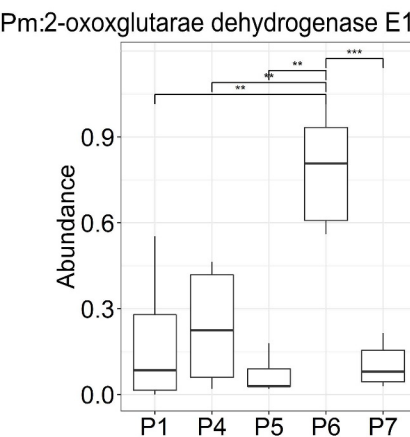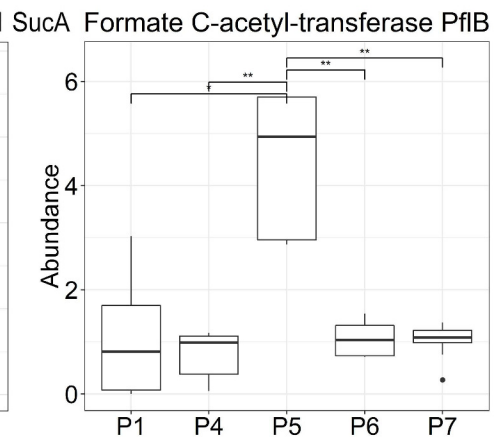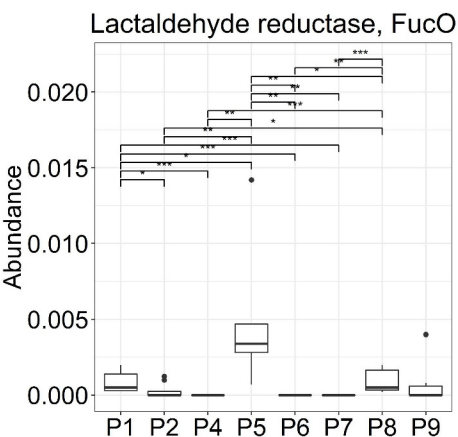

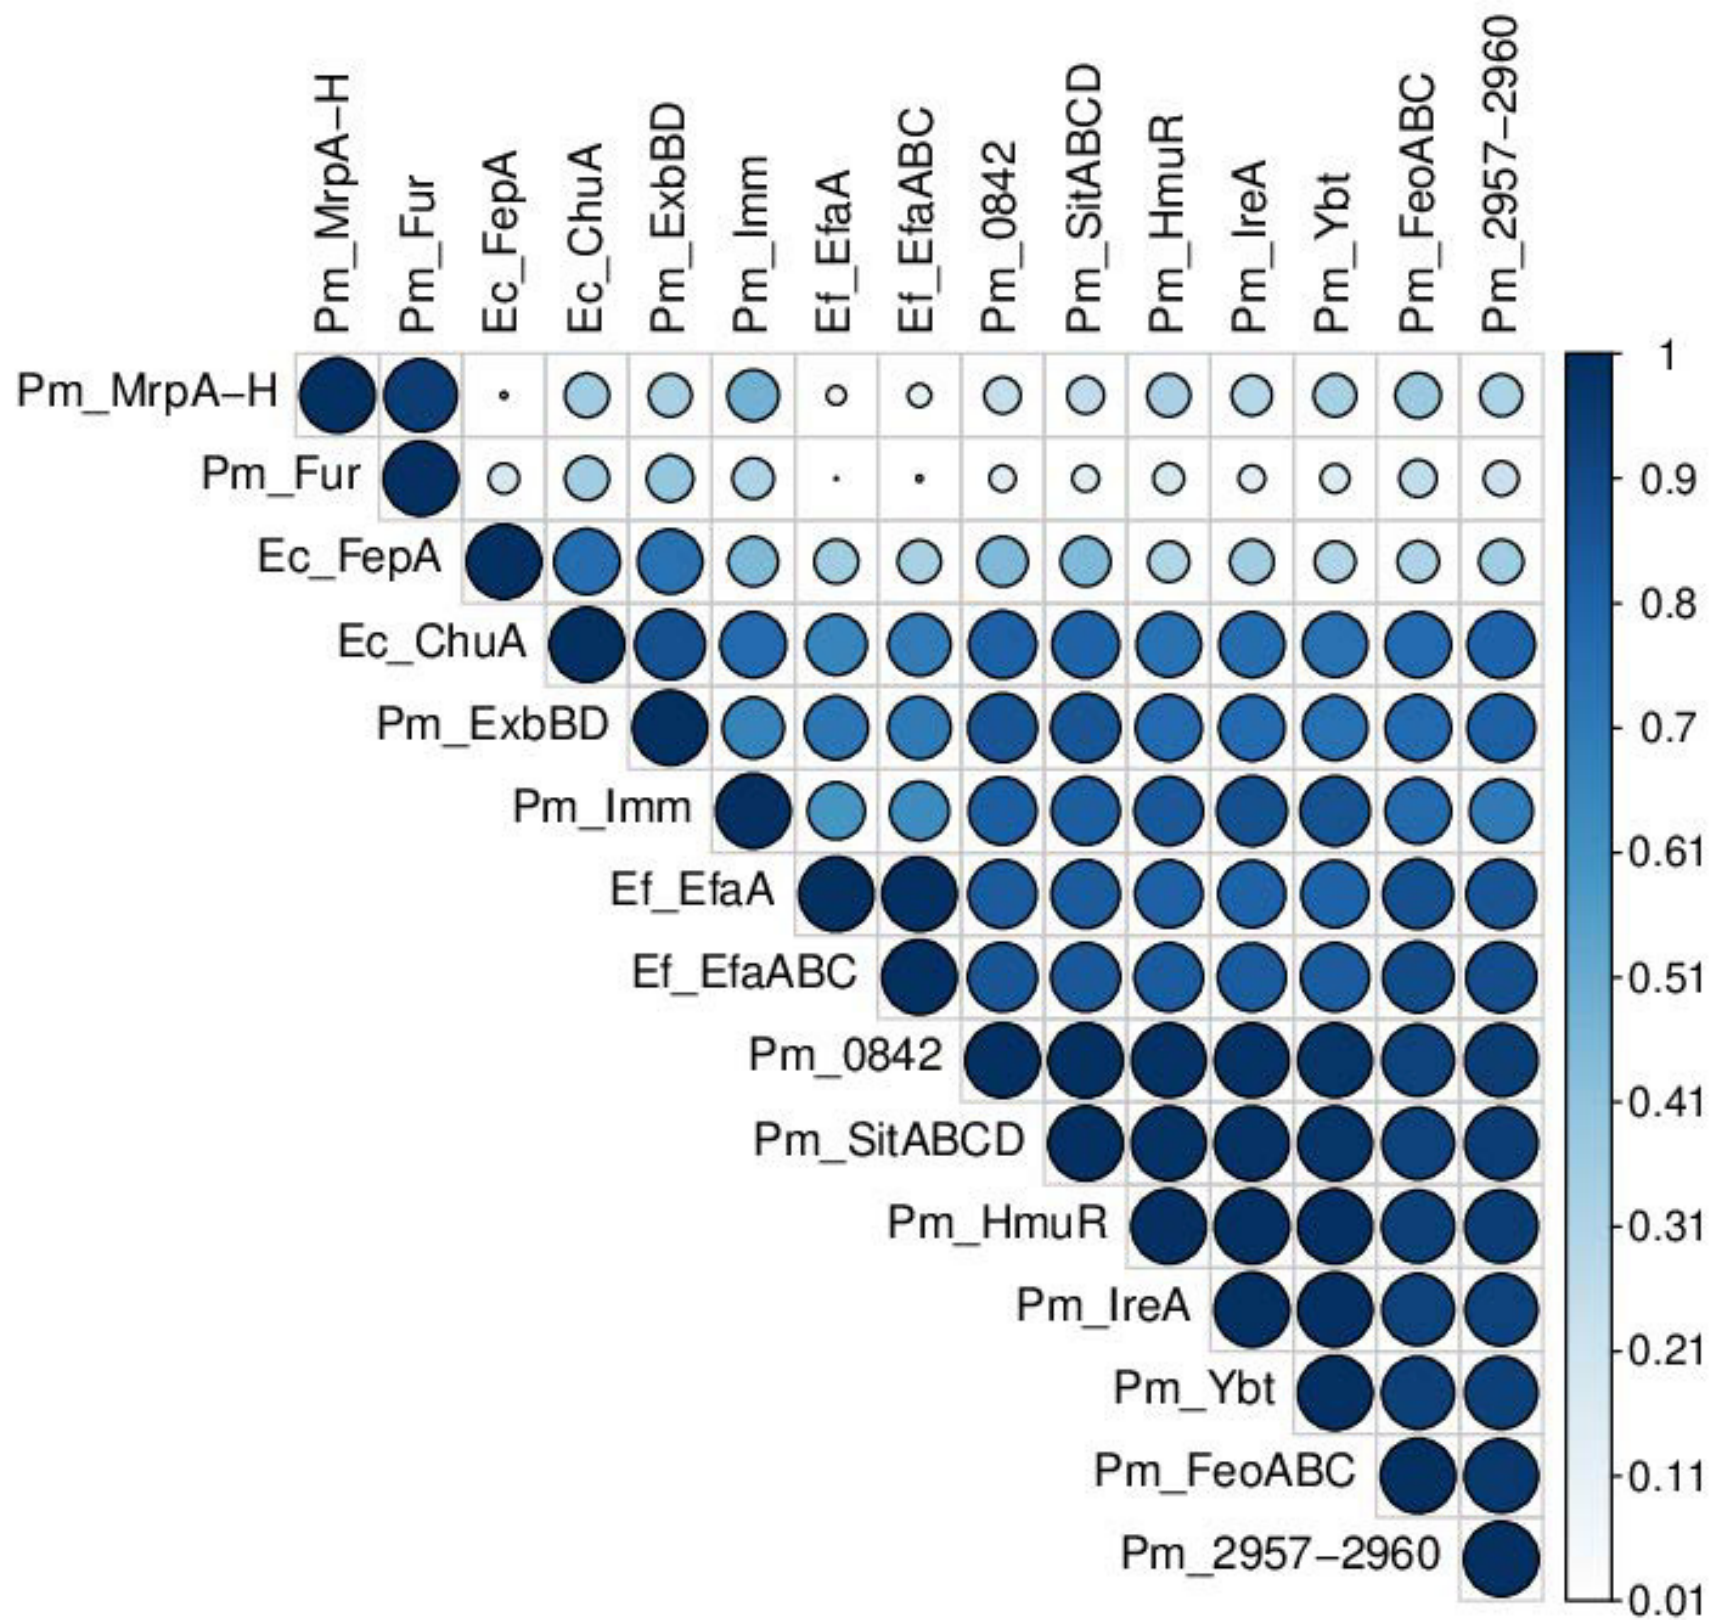

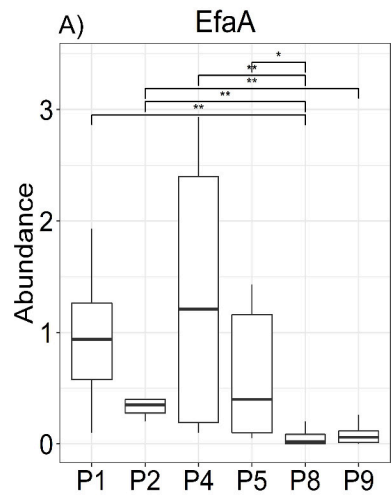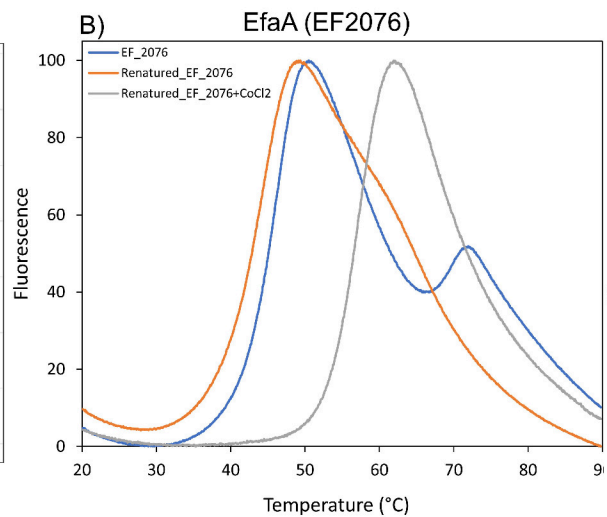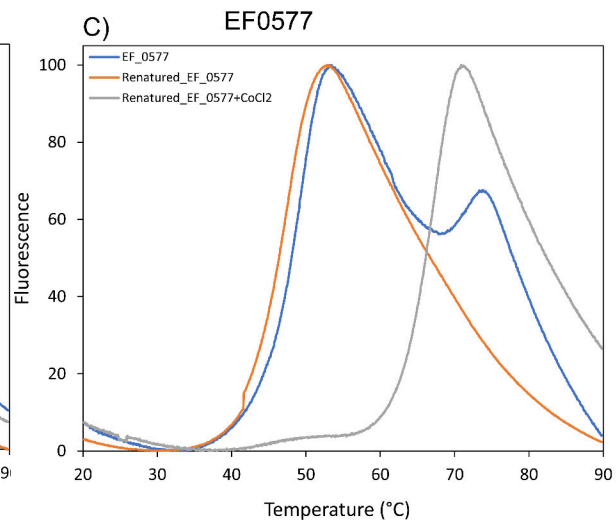



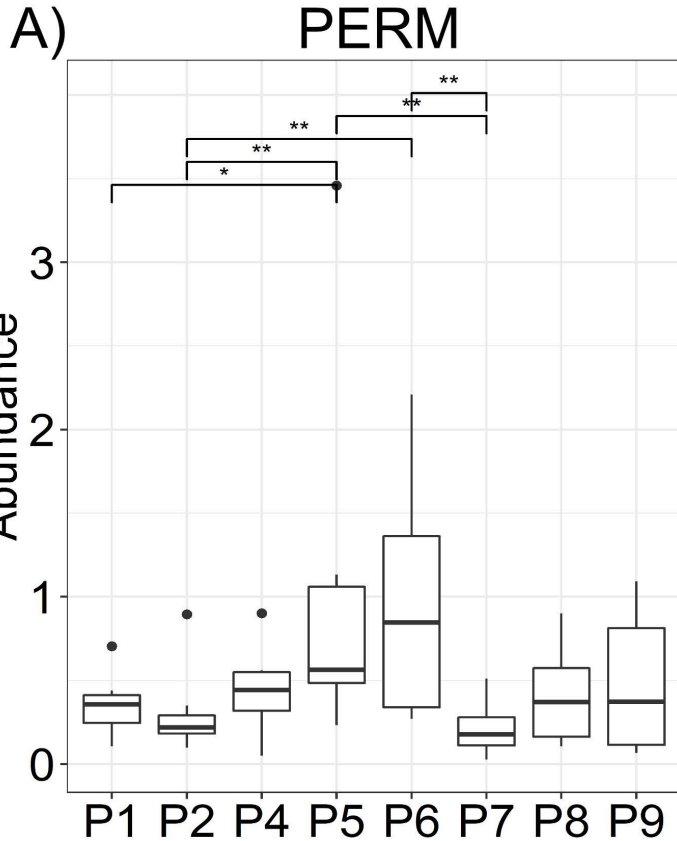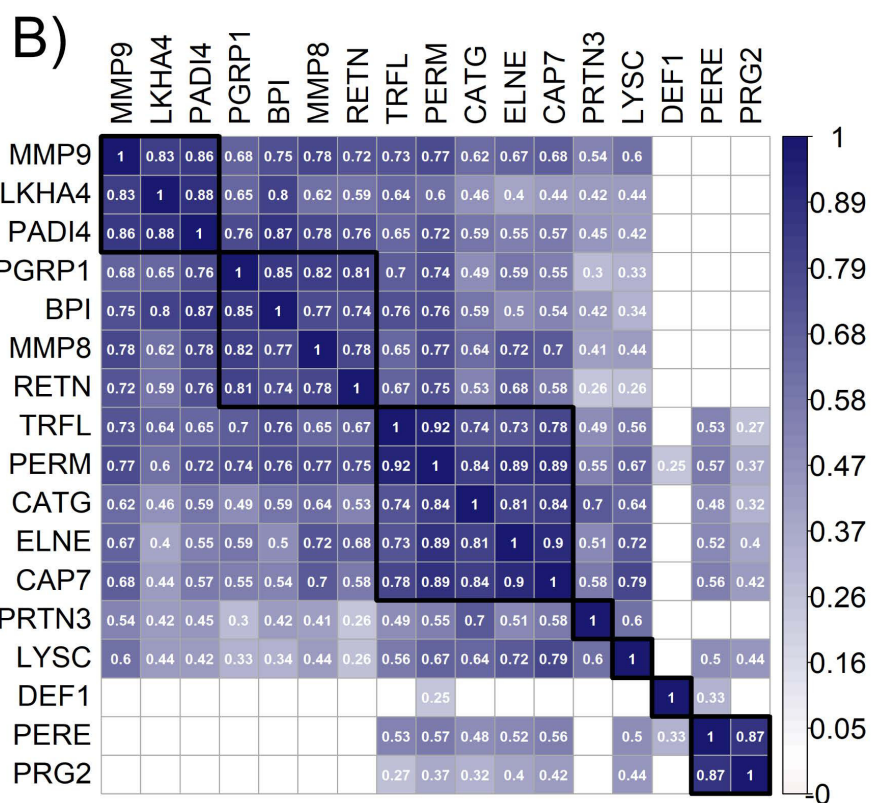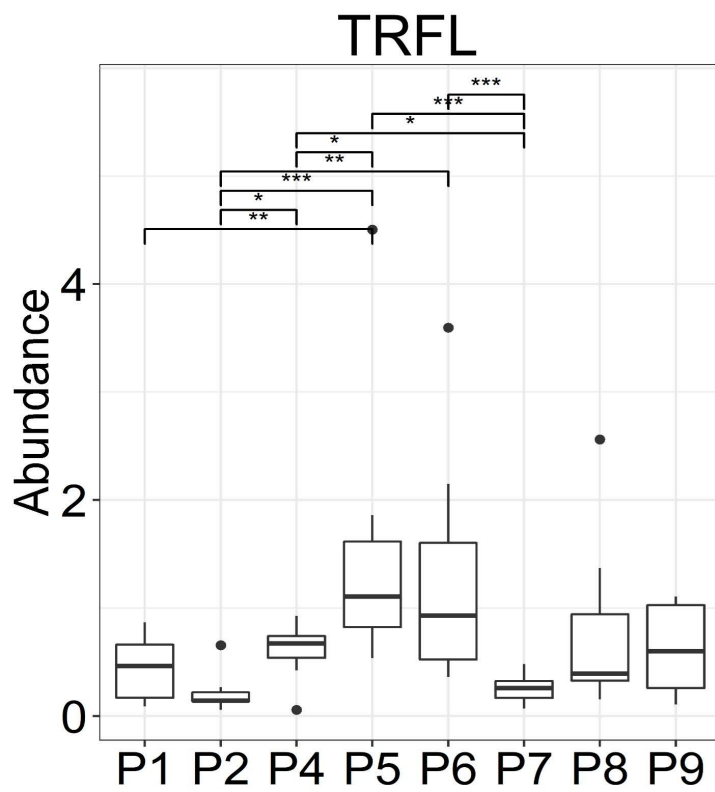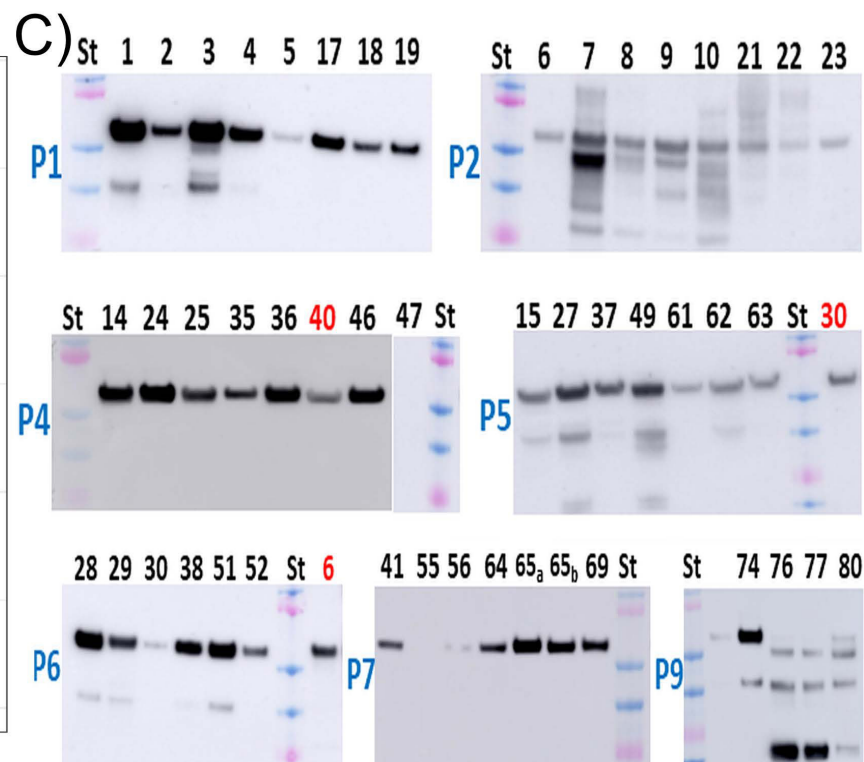

Source: https://www.biorxiv.org/content/10.1101/637819v1.full.pdf
